# Supplementary material for: Circularly polarized luminescence and performance modulation of chiral europium-titanium (Eu2Ti4)-oxo clusters
Source: Royal Society of Chemistry journal article supplement (doi:10.1039/d2cc05816b), 2022-11-30
Supplement: d2cc05816b1.pdf [file d2cc05816b1.pdf]

## Supporting information

### Circularly Polarized Luminescence and Performance Modulation of Chiral Europium-Titanium-Oxo Clusters $\text{Eu}_2\text{Ti}_4$

Wei-Dong Liu<sup>1</sup>, Guan-Jun Li<sup>1</sup>, Han Xu<sup>1</sup>, Yong-kai Deng<sup>1,2</sup>, Ming-Hao Du<sup>1</sup>, La-Sheng Long<sup>1</sup>, Lan-Sun Zheng<sup>1</sup> and Xiang-Jian Kong<sup>1\*</sup>

<sup>1</sup> Collaborative Innovation Center of Chemistry for Energy Materials, State Key Laboratory of Physical Chemistry of Solid Surfaces, and Department of Chemistry, College of Chemistry and Chemical Engineering, Xiamen University, Xiamen 361005, P. R. China.

<sup>2</sup> School of Chemistry and Chemical Engineering, State Key Laboratory of Crystal Materials, Shandong University, Jinan 250100, P. R. China.

\*Corresponding author: [xjkong@xmu.edu.cn](mailto:xjkong@xmu.edu.cn)

#### Content

|                                                                                      |           |
|--------------------------------------------------------------------------------------|-----------|
| <b>Physical Measurements</b> .....                                                   | <b>2</b>  |
| <b>Synthesis and characteristics of 4,5-pinene-2,2'-bipyridine enantiomers</b> ..... | <b>4</b>  |
| Synthesis of (+)-4,5-Pinene-2,2'-Bipyridine.....                                     | 4         |
| Synthesis of (-)-4,5-Pinene-2,2'-Bipyridine.....                                     | 7         |
| <b>Synthesis and characteristics of chiral europium-titanium-oxo clusters</b> .....  | <b>10</b> |
| Synthesis of <b>1-6</b> .....                                                        | 10        |
| Single crystal structure refinements of <b>1-6</b> .....                             | 12        |
| Detailed bond distances and bond angles of <b>1-6</b> .....                          | 22        |

## Physical Measurements

### X-ray Crystallography

The crystal data of 4,5-pinene-2,2'-bipyridine enantiomers and **1-6** were collected on a Rigaku Oxford Diffraction XtaLAB Synergy diffractometer with micro-focus sealed X-ray Cu K $\alpha$  radiation ( $\lambda = 1.54184 \text{ \AA}$ ) at 100 K. Crystallography data reduction and faces absorption correction were performed using CrysAlisPro software (Rigaku Oxford Diffraction, 2015). The structure was solved by intrinsic phasing (SHEXT) and refined by full-matrix least-squares calculations based on  $F^2$  using the SHELXTL-2018 software package. All the nonhydrogen atoms are refined anisotropically. The solvent contribution to the scattering factors of 4,5-pinene-2,2'-bipyridine enantiomers and **1-6** has been taken into account with PLATON/SQUEEZE. Detailed crystal data and structure refinement parameters for 4,5-pinene-2,2'-bipyridine enantiomers and **1-6** are listed in **Table S5** and **Table S7-S9** in the Supporting Information.

### Luminescence and Circularly Polarized Luminescence (CPL) Measurements

The excitation and emission spectra of the room-temperature luminescence were measured on the steady-state and transient fluorescence spectrometer (FLS-1000, Edinburgh) equipped with a 450W Xenon lamp. The time-resolved PL decay curve was obtained on the same instrument with a microsecond flashlamp. The absolute quantum yield was collected also on the FLS-1000 at room temperature using a calibrated integrating sphere (coating with a PTFE-like material with a reflectance >99%) as the chamber. The circularly polarized luminescence spectra were measured on the circularly polarized luminescence spectrometer (CPL-200, JASCO). The  $1 \times 10^{-5} \text{ M}$   $\text{CH}_2\text{Cl}_2$  solutions of **1-6** were prepared. The CPL measurements were performed at room temperature. The acquisition step is 1 nm and the acquisition time is one data point / 2 s.

### Nuclear magnetic resonance (NMR)

$^1\text{H}$  NMR spectra of 4,5-pinene-2,2'-bipyridine enantiomers were recorded at room temperature on a Avance III HD (500 MHz  $^1\text{H}$  NMR,  $\delta/\text{ppm}$ ), the chemical shifts are reported in ppm. The solvent used was deuterated chloroform  $\text{CDCl}_3$ .

### High-resolution electrospray ionization mass spectrometry (HRESI-MS)

The high-resolution electrospray ionization mass spectrometry was performed on Agilent Technologies ESI-TOF-MS 6224A instrumentation. Typical measurement conditions are as follows: end plate offset = -400 V; dry gas = 3 L·min<sup>-1</sup>, nebulizer = 0.3 bar, capillary voltage = 3500 V, sample flow rate = 4 L·min<sup>-1</sup>. The data analysis of mass spectrum was performed based on the isotope distribution patterns using Compass Data Analysis software.

### **Circular Dichroism (CD)**

Dispersing one crystal into 100 mg KBr by grinding could effectively reduce the macroscopic anisotropic arrangement, and the mixtures were tableted for testing. The circular dichroism (CD) spectra were recorded on a JASCO J-810 spectropolarimeter at room temperature.

### **UV-Vis spectroscopy**

The UV-Vis absorption spectra of 4,5-pinene-2,2'-bipyridine enantiomers and CH<sub>2</sub>Cl<sub>2</sub> solutions of **1-6**, and diffuse reflectance spectra (DRS) of **1-6** were obtained on a UV/Vis/NIR Spectrophotometer (PerkinElmer, Lambda 1050+).

### **Elemental Analysis**

Microanalyses of C, H and O elements were carried out with an Element Analyzer (EA, Flash Smart CHNS/O).

### **Thermogravimetric Analysis (TGA)**

Thermogravimetric analysis was prepared in N<sub>2</sub> using a Thermogravimetric analysis-Mass spectrometry (TGA-MS, SDT-650).

### **Fourier Transform Infrared Spectroscopy (FT-IR)**

The infrared spectra were recorded on an In situ FT-IR Spectrometer (Bruker Vertex 70V) utilizing a single attenuated total reflectance (ATR) accessory.

### **Powder X-ray diffraction (PXRD)**

The powder X-ray diffraction (PXRD) pattern was recorded on the Rigaku Smartlab-SE diffractionmeter using Cu-K $\alpha$  radiation at 25 kV and 100 mA with a scanning rate of 5°/min.

### **Synthesis and characteristics of 4,5-pinene-2,2'-bipyridine enantiomers.**

**Table S1.** The information on 4,5-pinene-2,2'-bipyridine enantiomers.

| Chemical                       | CAS         | Formula                                        | MW     | Chemical Structure                                                                  |
|--------------------------------|-------------|------------------------------------------------|--------|-------------------------------------------------------------------------------------|
| (+)-4,5-Pinene-2,2'-Bipyridine | 177932-45-5 | C <sub>17</sub> H <sub>18</sub> N <sub>2</sub> | 250.34 | 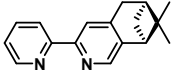 |
| (-)-4,5-Pinene-2,2'-Bipyridine | 144176-23-8 | C <sub>17</sub> H <sub>18</sub> N <sub>2</sub> | 250.34 |  |

Synthesis Routes of the 4,5-pinene-2,2'-bipyridine enantiomers:

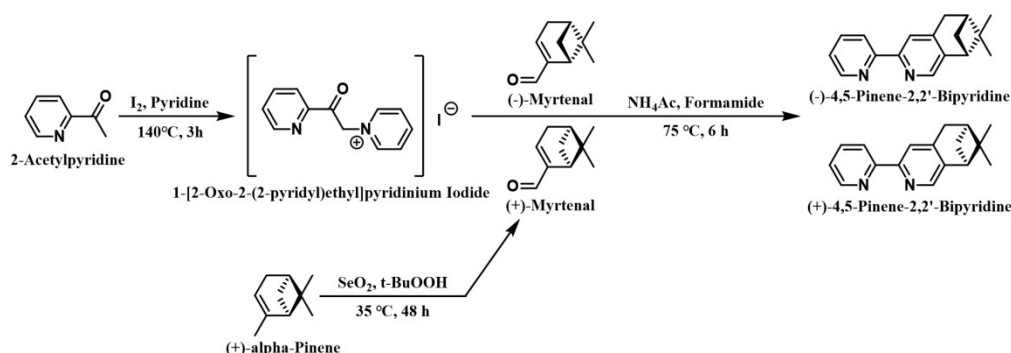

### Synthesis of (+)-4,5-Pinene-2,2'-Bipyridine

The synthesis of (+)-4,5-pinene-2,2'-bipyridine requires the synthesis of two precursors first, requiring a total of three reactions.<sup>[1]</sup>

#### Step 1: Synthesis of 1-[2-Oxo-2-(2-pyridyl)ethyl]pyridinium Iodide.

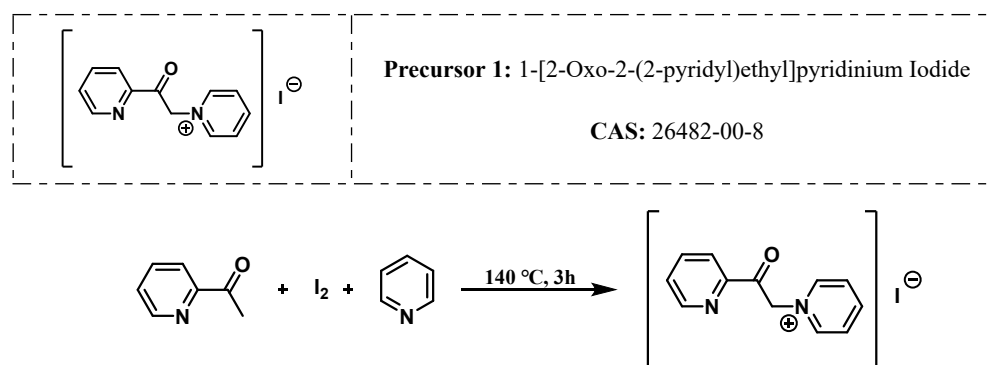

2-acetylpyridine (6.06 g, 50 mmol) and iodine (12.69 g, 50 mmol) were added to a 100 mL round-bottom flask. Then add 40 mL of pyridine and fully dissolve the solid. Heated to 140 °C and refluxed for 3 h. After the reaction, the round-bottom flask was cooled with an ice bath at 0 °C for 30 min. Suction-filtered the reaction mixture under reduced pressure. The solid product was washed several times with a small amount of icy pyridine and acetone and dried under vacuum to

obtain a gray-black solid without further purification (yield: 45.8%).

**Table S2.** The information on used chemicals in *step 1*.

| Chemical         | CAS       | Formula                          | MW / FW     | Purity Level | Brand   |
|------------------|-----------|----------------------------------|-------------|--------------|---------|
| 2-Acetylpyridine | 1122-62-9 | C <sub>7</sub> H <sub>7</sub> NO | 121.14 (MW) | AR           | Aladdin |
| Iodine           | 7553-56-2 | I <sub>2</sub>                   | 253.81 (MW) | AR           | Aladdin |
| Pyridine         | 110-86-1  | C <sub>5</sub> H <sub>5</sub> N  | 79.10 (FW)  | AR           | SCR     |
| Acetone          | 67-64-1   | C <sub>3</sub> H <sub>6</sub> O  | 58.08 (FW)  | AR           | SCR     |

### Step 2: Synthesis of (+)-Myrtenal.

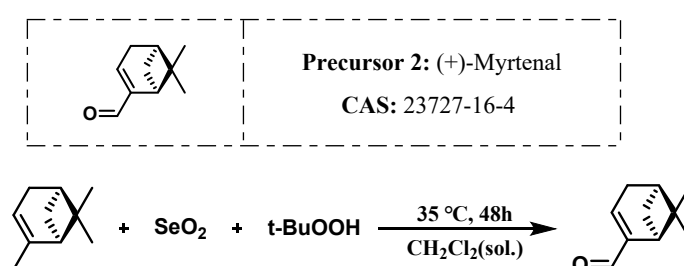

80 mL of dichloromethane and 62 mL of tert-butyl hydroperoxide 70% aqueous solution were measured in a partition funnel and shaken and left to extract. The lower liquid (organic phase) was poured into a 250 mL two-necked round-bottom flask containing 0.52 g SeO<sub>2</sub>. Stirring at room temperature, SeO<sub>2</sub> was dissolved and then heated up to 35 °C. After 20.45 mL of (+)- $\alpha$ -pinene was slowly (approximately 2 h) dropped into the reaction solution with a constant pressure dropping funnel, the reaction was carried out for 48 h. After the reaction, the reaction mixture was washed with 60 mL of dilute KOH aqueous solution, and then washed with saturated NaCl aqueous solution to neutral. The organic phase was dried with anhydrous Na<sub>2</sub>SO<sub>4</sub>. After suction filtration, the solvent was removed by rotary-evaporation to obtain a dark yellow cloudy crude product. The product was collected by elution with absolute ether/petroleum ether = 1:10 (v/v) over the column, and the product was obtained as a pale-yellow liquid product after spin evaporation (yield 25.7%).

**Table S3.** The information on used chemicals in *step 2*.

| Chemical                           | CAS       | Formula                                       | MW / FW     | Purity Level         | Brand   |
|------------------------------------|-----------|-----------------------------------------------|-------------|----------------------|---------|
| tert-Butyl Hydroperoxide (t-BuOOH) | 75-91-2   | C <sub>4</sub> H <sub>10</sub> O <sub>2</sub> | 90.12 (MW)  | 70% aqueous solution | Acros   |
| Selenium Dioxide                   | 7446-08-4 | SeO <sub>2</sub>                              | 110.96 (MW) | AR                   | Aladdin |
| Dichloromethane                    | 75-09-2   | CH <sub>2</sub> Cl <sub>2</sub>               | 84.93 (FW)  | AR                   | SCR     |

|                          |           |                                               |             |    |         |
|--------------------------|-----------|-----------------------------------------------|-------------|----|---------|
| (+)- $\alpha$ -Pinene    | 7785-70-8 | C <sub>10</sub> H <sub>16</sub>               | 136.24 (MW) | AR | Aladdin |
| Potassium Hydroxide      | 1310-58-3 | KOH                                           | 56.11 (MW)  | AR | SCR     |
| Sodium Chloride          | 7647-14-5 | NaCl                                          | 58.44 (MW)  | AR | SCR     |
| Sodium Sulfate           | 7757-82-6 | Na <sub>2</sub> SO <sub>4</sub>               | 142.04 (MW) | AR | SCR     |
| Petroleum Ether 60-90 °C | 8032-32-4 | C <sub>5</sub> H <sub>12</sub> O <sub>2</sub> | 195.34 (FW) | AR | SCR     |
| Absolute Ether           | 60-29-7   | C <sub>4</sub> H <sub>10</sub> O              | 74.12 (FW)  | AR | SCR     |

### Step 3: Synthesis of (+)-4,5-Pinene-2,2'-Bipyridine.

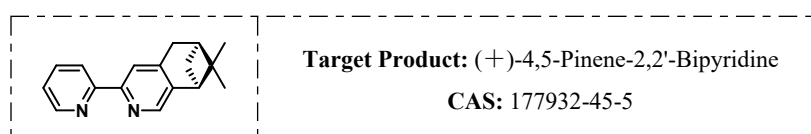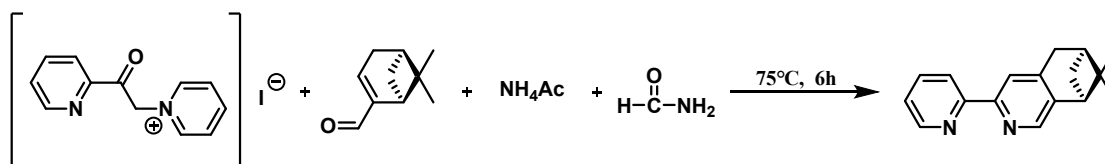

6.5 g 1-[2-oxo-2-(2-pyridyl)ethyl]pyridinium iodide (*precursor 1*), 3.0 g (+)-myrtenal (*precursor 2*), 3.1 g ammonium acetate and 30 mL formamide were added to a 100 mL round-bottom flask and refluxed at 75 °C for 6 h. After the reaction, 30 mL of water was added immediately. The mixture was stirred continuedly for 30 s and cooled to room temperature. Multiple extractions were performed with hexane, and the organic phases were combined, dried with anhydrous Na<sub>2</sub>SO<sub>4</sub>, suction filtered by extraction, and rotary-evaporated to get a brownish crude product. Multiple extractions were performed with hexane, and the organic phases were combined, dried with anhydrous Na<sub>2</sub>SO<sub>4</sub>, suction filtered by extraction, and rotary-evaporated to get a brownish crude product. The product was eluted with 400 mL of absolute ether/petroleum ether = 1:50 (v/v), and the fraction was not collected in this step; then eluted with 300 mL of triethylamine/hexane/ethyl acetate = 1:4.5:4.5 (v/v), and the fraction was collected and rotary-evaporated to obtain a yellowish-brown solid product, which was dried under vacuum, washed with acetone by filtration, and dried to obtain a light-yellow solid. The light-yellow solid was redissolved in a small amount of acetone and recrystallized at room temperature to obtain colorless block crystals (yield: 32.7%).

**Table S4.** The information on used chemicals in *step 3*.

| Chemical                                      | CAS        | Formula                                           | MW / FW     | Purity Level | Brand              |
|-----------------------------------------------|------------|---------------------------------------------------|-------------|--------------|--------------------|
| 1-[2-Oxo-2-(2-pyridyl)ethyl]pyridinium Iodide | 26482-00-8 | C <sub>12</sub> H <sub>11</sub> N <sub>2</sub> OI | 326.20 (MW) | /            | <i>precursor 1</i> |
| (+)-Myrtenal                                  | 23727-16-4 | C <sub>10</sub> H <sub>14</sub> O                 | 150.22 (MW) | /            | <i>precursor 2</i> |
| Ammonium Acetate                              | 631-61-8   | C <sub>2</sub> H <sub>7</sub> O <sub>2</sub> N    | 77.08 (FW)  | AR           | SCR                |
| Formamide                                     | 75-12-7    | CH <sub>3</sub> NO                                | 45.04 (MW)  | AR           | Aladdin            |
| Hexane                                        | 110-54-3   | C <sub>6</sub> H <sub>14</sub>                    | 86.18 (FW)  | AR           | SCR                |
| Sodium Sulfate                                | 7757-82-6  | Na <sub>2</sub> SO <sub>4</sub>                   | 142.04 (MW) | AR           | SCR                |
| Petroleum Ether 60-90 °C                      | 8032-32-4  | C <sub>5</sub> H <sub>12</sub> O <sub>2</sub>     | 195.34 (FW) | AR           | SCR                |
| Absolute Ether                                | 60-29-7    | C <sub>4</sub> H <sub>10</sub> O                  | 74.12 (FW)  | AR           | SCR                |
| Triethylamine                                 | 121-44-8   | C <sub>6</sub> H <sub>15</sub> N                  | 101.19 (FW) | AR           | SCR                |
| Ethyl acetate                                 | 141-78-6   | C <sub>4</sub> H <sub>8</sub> O <sub>2</sub>      | 88.11 (FW)  | AR           | SCR                |

### Synthesis of (-)-4,5-Pinene-2,2'-Bipyridine

Because (-)-myrtenal is purchased commercially, the synthesis of (-)-4,5-pinene-2,2'-bipyridine requires only two steps. The **step 1** is exactly the same as *the step 1 above*, and the difference between the **step 2** and *the step 3 above* is only the replacement of the (+)-myrtenal with (-)-myrtenal (CAS: 18486-69-6, Aladdin), yield is 48.5%.

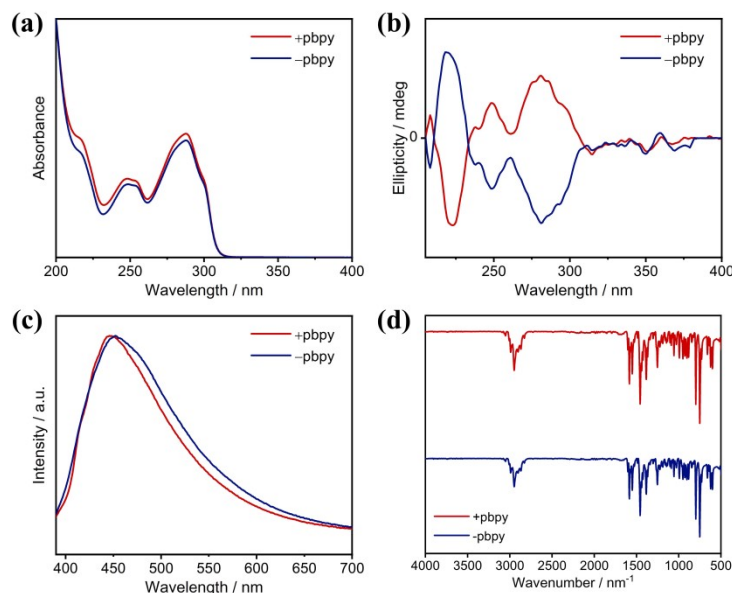

**Fig. S1** (a) The UV-vis absorption spectra of 4,5-pinene-2,2'-bipyridine enantiomers; (b) The CD spectra of 4,5-pinene-2,2'-bipyridine enantiomers; (c) The emission spectra of 4,5-pinene-2,2'-bipyridine enantiomers; (d) The FT-IR of 4,5-pinene-2,2'-bipyridine enantiomers.

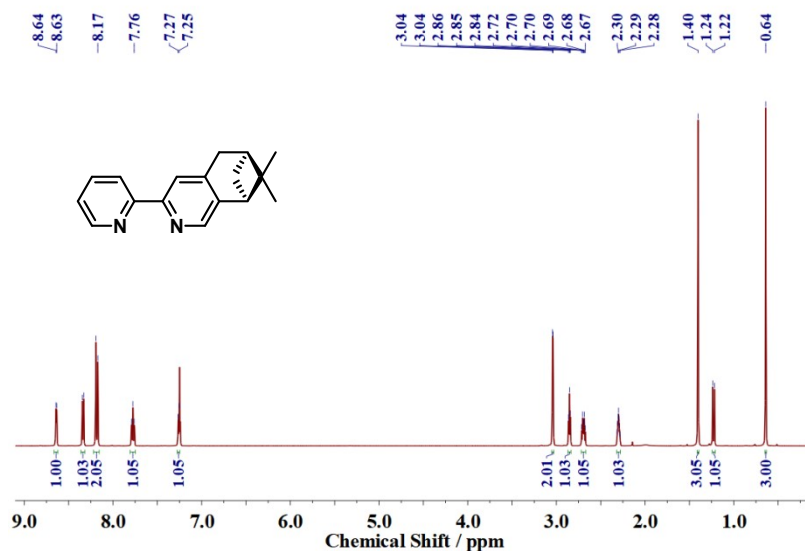

**Fig. S2** The  $^1\text{H}$  NMR spectrometry of (+)-4,5-pinene-2,2'-bipyridine.

$^1\text{H}$  NMR (500 MHz,  $\text{CDCl}_3$ )  $\delta$  8.64 (d,  $J = 4.2$  Hz, 1H), 8.64 (d,  $J = 4.2$  Hz, 1H), 8.34 (d,  $J = 8.0$  Hz, 1H), 8.34 (d,  $J = 8.0$  Hz, 1H), 8.18 (d,  $J = 10.9$  Hz, 2H), 8.18 (d,  $J = 10.9$  Hz, 2H), 7.78 (t,  $J = 7.7$  Hz, 1H), 7.78 (t,  $J = 7.7$  Hz, 1H), 7.26 (d,  $J = 5.9$  Hz, 1H), 3.04 (d,  $J = 2.3$  Hz, 2H), 3.04 (d,  $J = 2.3$  Hz, 2H), 2.85 (t,  $J = 5.5$  Hz, 1H), 2.85 (t,  $J = 5.5$  Hz, 1H), 2.69 (dt,  $J = 9.7, 5.8$  Hz, 1H), 2.69 (dt,  $J = 9.7, 5.8$  Hz, 1H), 2.30 (dq,  $J = 8.4, 2.7$  Hz, 1H), 2.30 (dq,  $J = 8.4, 2.7$  Hz, 1H), 1.40 (s, 3H), 1.40 (s, 3H), 1.23 (d,  $J = 9.6$  Hz, 1H), 1.23 (d,  $J = 9.6$  Hz, 1H), 0.64 (s, 3H), 0.64 (s, 3H).

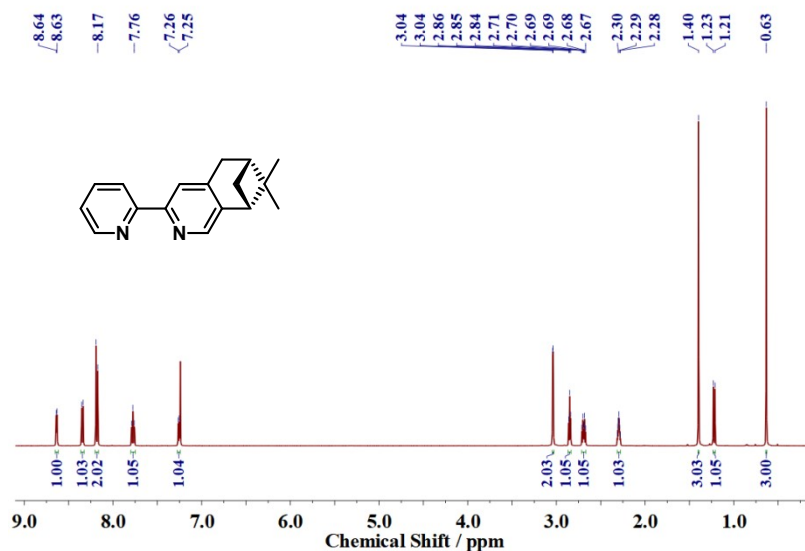

**Fig. S3** The  $^1\text{H}$  NMR spectrometry of (-)-4,5-pinene-2,2'-bipyridine.

$^1\text{H}$  NMR (500 MHz,  $\text{CDCl}_3$ )  $\delta$  8.63 (d,  $J = 4.1$  Hz, 1H), 8.63 (d,  $J = 4.1$  Hz, 1H), 8.34 (d,  $J = 8.0$  Hz, 1H), 8.34 (d,  $J = 8.0$  Hz, 1H), 8.18 (d,  $J = 9.9$  Hz, 2H), 8.18 (d,  $J = 9.9$  Hz, 2H), 7.78 (t,  $J = 7.7$  Hz, 1H), 7.78 (t,  $J = 7.7$  Hz, 1H), 7.26 (d,  $J = 4.9$  Hz, 1H), 7.26 (d,  $J = 4.9$  Hz, 1H), 3.04 (d,  $J = 2.6$  Hz, 2H), 3.04 (d,  $J = 2.6$  Hz, 2H), 2.85 (t,  $J = 5.5$  Hz, 1H), 2.85 (t,  $J = 5.5$  Hz, 1H), 2.69 (dt,  $J = 9.7, 5.8$  Hz, 1H), 2.69 (dt,  $J = 9.7, 5.8$  Hz, 1H), 2.30 (tt,  $J = 5.7, 2.8$  Hz, 1H), 2.30 (tt,  $J = 5.7, 2.8$  Hz, 1H), 1.40 (s, 3H), 1.40 (s, 3H), 1.22 (d,  $J = 9.6$  Hz, 1H), 1.22 (d,  $J = 9.6$  Hz, 1H), 0.63 (s, 3H), 0.63 (s, 3H).





**Table S5.** Single crystal structure refinements of 4,5-pinene-2,2'-bipyridine enantiomers.

| Chiral enantiomers                                   | (+)-4,5-pinene-2,2'-bipyridine                        | (-)-4,5-pinene-2,2'-bipyridine                        |
|------------------------------------------------------|-------------------------------------------------------|-------------------------------------------------------|
| CCDC                                                 | 2214390                                               | 2214391                                               |
| Formula                                              | C <sub>17</sub> H <sub>18</sub> N <sub>2</sub>        | C <sub>17</sub> H <sub>18</sub> N <sub>2</sub>        |
| <i>Mr</i>                                            | 250.33                                                | 250.33                                                |
| Temperature/K                                        | 99.9(9)                                               | 100.0(8)                                              |
| Crystal color                                        | colorless                                             | colorless                                             |
| Crystal system                                       | orthorhombic                                          | orthorhombic                                          |
| Space group                                          | <i>P</i> 2 <sub>1</sub> 2 <sub>1</sub> 2 <sub>1</sub> | <i>P</i> 2 <sub>1</sub> 2 <sub>1</sub> 2 <sub>1</sub> |
| <i>a</i> /Å                                          | 9.18000(10)                                           | 9.18570(10)                                           |
| <i>b</i> /Å                                          | 9.95850(10)                                           | 9.18570(10)                                           |
| <i>c</i> /Å                                          | 14.79740(10)                                          | 14.77970(10)                                          |
| $\alpha$ /°                                          | 90                                                    | 90                                                    |
| $\beta$ /°                                           | 90                                                    | 90                                                    |
| $\gamma$ /°                                          | 90                                                    | 90                                                    |
| <i>V</i> /Å <sup>3</sup>                             | 1352.76(2)                                            | 1351.01(2)                                            |
| <i>Z</i>                                             | 4                                                     | 4                                                     |
| $\rho_{\text{calc}}/\text{g}\cdot\text{cm}^{-3}$     | 1.229                                                 | 1.231                                                 |
| $\mu/\text{mm}^{-1}$                                 | 0.558                                                 | 0.558                                                 |
| $2\theta$ range/°                                    | 10.708-150.254                                        | 10.718 to 150.158                                     |
| Reflections collected                                | 29957                                                 | 29776                                                 |
| Data/restraints/parameters                           | 2669/0/174                                            | 2680/0/174                                            |
| Goodness-of-fit on $F^2$                             | 1.088                                                 | 1.082                                                 |
| Final R indexes [ $I \geq 2\sigma(I)$ ] <sup>a</sup> | R <sub>1</sub> = 0.0292, wR <sub>2</sub> = 0.0732     | R <sub>1</sub> = 0.0279, wR <sub>2</sub> = 0.0710     |
| Final R indexes [all data] <sup>b</sup>              | R <sub>1</sub> = 0.0292, wR <sub>2</sub> = 0.0733     | R <sub>1</sub> = 0.0280, wR <sub>2</sub> = 0.0711     |
| Flack parameter                                      | 0.11(7)                                               | 0.05(8)                                               |

$${}^a R_1 = \sum (| |F_o| - |F_c| |) / \sum |F_o|; {}^b wR_2 = \{ \sum [w (F_o^2 - F_c^2)^2] / \sum [w (F_o^2)^2] \}^{1/2};$$

$$w = 1/[{}^2(F_o)^2 + (aP)^2 + bP] \text{ and } P = (F_o^2 + 2F_c^2)/3.$$

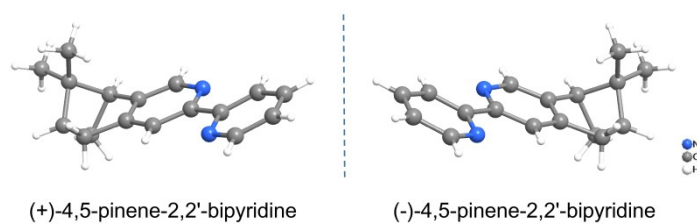**Fig. S4** The crystal structures of 4,5-pinene-2,2'-bipyridine enantiomers.

## Synthesis and characteristics of chiral europium-titanium-oxo clusters.

**Chemicals.** In the synthesis process of the used analytically pure europium acetate hydrate ( $\text{Eu}(\text{OAc})_3 \cdot x\text{H}_2\text{O}$ ), pivalic acid (Hpa), benzoic acid (Hba), 4-tert-butylbenzoic acid (4-Htbba), titanium tetraisopropanolate ( $\text{Ti}(\text{O}^i\text{Pr})_4$ ) and acetonitrile (MeCN) are all the commercial sources and were received without further purification. The pair of chiral ligands (+)-4,5-pinene-2,2'-bipyridine (+pbpy) and (-)-4,5-pinene-2,2'-bipyridine (-pbpy) were synthesized according to the above procedures by self.

**Table S6.** The information on used chemicals in the synthesis process of 1-6.

| Chemical                                                                         | CAS         | Formula                                                 | MW / FW     | Purity Level | Brand      |
|----------------------------------------------------------------------------------|-------------|---------------------------------------------------------|-------------|--------------|------------|
| Europium Acetate Hydrate ( $\text{Eu}(\text{OAc})_3 \cdot x\text{H}_2\text{O}$ ) | 62667-64-5  | $\text{Eu}(\text{OOCCH}_3)_3 \cdot x\text{H}_2\text{O}$ | 329.10 (MW) | AR           | Aladdin    |
| Titanium Tetraisopropanolate ( $\text{Ti}(\text{O}^i\text{Pr})_4$ )              | 546-68-9    | $\text{Ti}[\text{OCH}(\text{CH}_3)_2]_4$                | 284.23 (FW) | AR           | Alfa Aesar |
| Pivalic Acid                                                                     | 75-98-9     | $(\text{CH}_3)_3\text{CCOOH}$                           | 102.13 (MW) | AR           | Aladdin    |
| Benzoic Acid                                                                     | 65-85-0     | $\text{C}_6\text{H}_5\text{COOH}$                       | 122.12 (MW) | AR           | Aladdin    |
| 4-tert-Butylbenzoic Acid                                                         | 98-73-7     | $(\text{CH}_3)_3\text{CC}_6\text{H}_4\text{COOH}$       | 178.23 (MW) | AR           | Aladdin    |
| (+)-4,5-Pinene-2,2'-Bipyridine                                                   | 177932-45-5 | $\text{C}_{17}\text{H}_{18}\text{N}_2$                  | 250.34 (MW) | /            | /          |
| (-)-4,5-Pinene-2,2'-Bipyridine                                                   | 144176-23-8 | $\text{C}_{17}\text{H}_{18}\text{N}_2$                  | 250.34 (MW) | /            | /          |
| Acetonitrile (MeCN)                                                              | 75-05-8     | $\text{CH}_3\text{CN}$                                  | 41.05 (FW)  | AR           | SCR        |

### Synthesis of 1-6.

$\text{Eu}_2\text{Ti}_4(\mu_2\text{-O})_2(\mu_3\text{-O})_4(+\text{pbpy})_2(\text{pa})_{10}$  (**1**)  $\text{Eu}(\text{OAc})_3 \cdot x\text{H}_2\text{O}$  (16.5 mg, 0.05 mmol), pivalic acid (Hpa, 76.6 mg, 0.75 mmol), (+)-4,5-pinene-2,2'-bipyridine (+pbpy, 17.5 mg, 0.07 mmol) and 4 mL MeCN were added to an 8 mL vial. Then  $\text{Ti}(\text{O}^i\text{Pr})_4$  (15  $\mu\text{L}$ , 0.05 mmol) was added dropwise into the above mixture. The new mixture was sealed and sonicated for 5 min. Colorless block-shaped crystals were obtained after 2 days in a 80 °C temperature environment (37.6% yield based on  $\text{Eu}(\text{OAc})_3 \cdot x\text{H}_2\text{O}$ ). Anal. Calcd for  $\text{C}_{84}\text{H}_{126}\text{O}_{26}\text{N}_6\text{Eu}_2\text{Ti}_4$  (FW = 2103.40): C, 47.96; H, 6.03; O, 19.78; N, 2.66 (%); Found: C, 48.09; H, 6.05; O, 19.67; N, 2.71 (%).

$\text{Eu}_2\text{Ti}_4(\mu_2\text{-O})_2(\mu_3\text{-O})_4(-\text{pbpy})_2(\text{pa})_{10}$  (**2**) was synthesized by the same method as **1** except the substitution of (+)-4,5-pinene-2,2'-bipyridine to (-)-4,5-pinene-2,2'-bipyridine (-pbpy). Colorless block-shaped crystals were obtained (36.4% yield based on  $\text{Eu}(\text{OAc})_3 \cdot x\text{H}_2\text{O}$ ). Anal. Calcd for  $\text{C}_{84}\text{H}_{126}\text{O}_{26}\text{N}_6\text{Eu}_2\text{Ti}_4$  (FW = 2103.40): C, 47.96; H, 6.03; O, 19.78; N, 2.66 (%); Found: C, 48.05; H, 6.06; O, 19.73; N, 2.68 (%).

***Eu<sub>2</sub>Ti<sub>4</sub>(μ<sub>2</sub>-O)<sub>2</sub>(μ<sub>3</sub>-O)<sub>4</sub>(+pbpy)<sub>2</sub>(ba)<sub>10</sub> (3)*** Eu(OAc)<sub>3</sub>·xH<sub>2</sub>O (16.5 mg, 0.05 mmol), benzoic acid (Hba, 122.1 mg, 1.00 mmol), (+)-4,5-pinene-2,2'-bipyridine (+pbpy, 25.0 mg, 0.10 mmol) and 5 mL MeCN were added to an 8 mL vial. Then Ti(O<sup>i</sup>Pr)<sub>4</sub> (36 μL, 0.12 mmol) was added dropwise into the above mixture. The new mixture was sealed and sonicated for 5 min. Colorless block-shaped crystals were obtained after 2 days in a 80 °C temperature environment (42.6% yield based on Eu(OAc)<sub>3</sub>·xH<sub>2</sub>O). Anal. Calcd for C<sub>104</sub>H<sub>86</sub>O<sub>26</sub>N<sub>6</sub>Eu<sub>2</sub>Ti<sub>4</sub> (FW = 2303.28): C, 54.23; H, 3.76; O, 18.06; N, 2.43 (%); Found: C, 54.25; H, 3.73; O, 18.16; N, 2.48 (%).

***Eu<sub>2</sub>Ti<sub>4</sub>(μ<sub>2</sub>-O)<sub>2</sub>(μ<sub>3</sub>-O)<sub>4</sub>(-pbpy)<sub>2</sub>(ba)<sub>10</sub> (4)*** was synthesized by the same method as **3** except the substitution of (+)-4,5-pinene-2,2'-bipyridine to (-)-4,5-pinene-2,2'-bipyridine (-pbpy). Colorless block-shaped crystals were obtained (43.4% yield based on Eu(OAc)<sub>3</sub>·xH<sub>2</sub>O). Anal. Calcd for C<sub>104</sub>H<sub>86</sub>O<sub>26</sub>N<sub>6</sub>Eu<sub>2</sub>Ti<sub>4</sub> (FW = 2303.28): C, 54.23; H, 3.76; O, 18.06; N, 2.43 (%); Found: C, 54.26; H, 3.77; O, 18.14; N, 2.47 (%).

***Eu<sub>2</sub>Ti<sub>4</sub>(μ<sub>2</sub>-O)<sub>2</sub>(μ<sub>3</sub>-O)<sub>4</sub>(+pbpy)<sub>2</sub>(4-tbba)<sub>10</sub> (5)*** Eu(OAc)<sub>3</sub>·xH<sub>2</sub>O (16.5 mg, 0.05 mmol), 4-tert-butylbenzoic acid (4-Htbba, 142.56 mg, 0.80 mmol), (+)-4,5-pinene-2,2'-bipyridine (+pbpy, 25.0 mg, 0.10 mmol) and 4 mL MeCN were added to an 8 mL vial. Then Ti(O<sup>i</sup>Pr)<sub>4</sub> (36 μL, 0.12 mmol) was added dropwise into the above mixture. The new mixture was sealed and sonicated for 5 min. Colorless block-shaped crystals were obtained after 2 days in a 80 °C temperature environment (40.8% yield based on Eu(OAc)<sub>3</sub>·xH<sub>2</sub>O). Anal. Calcd for C<sub>144</sub>H<sub>166</sub>O<sub>26</sub>N<sub>4</sub>Eu<sub>2</sub>Ti<sub>4</sub> (FW = 2864.32): C, 60.38; H, 5.83; O, 14.52; N, 1.96 (%); Found: C, 60.43; H, 5.85; O, 14.59; N, 1.97 (%).

***Eu<sub>2</sub>Ti<sub>4</sub>(μ<sub>2</sub>-O)<sub>2</sub>(μ<sub>3</sub>-O)<sub>4</sub>(-pbpy)<sub>2</sub>(4-tbba)<sub>10</sub> (6)*** was synthesized by the same method as **5** except the substitution of (+)-4,5-pinene-2,2'-bipyridine to (-)-4,5-pinene-2,2'-bipyridine (-pbpy). Colorless block-shaped crystals were obtained (41.4% yield based on Eu(OAc)<sub>3</sub>·xH<sub>2</sub>O). Anal. Calcd for C<sub>144</sub>H<sub>166</sub>O<sub>26</sub>N<sub>4</sub>Eu<sub>2</sub>Ti<sub>4</sub> (FW = 2864.32): C, 60.38; H, 5.83; O, 14.52; N, 1.96 (%); Found: C, 60.40; H, 5.88; O, 14.61; N, 1.99 (%).

**Table S7.** Single crystal structure refinements of **1&2**.

| Clusters                                                  | 1                                                                                               | 2                                                                                               |
|-----------------------------------------------------------|-------------------------------------------------------------------------------------------------|-------------------------------------------------------------------------------------------------|
| CCDC                                                      | 2214392                                                                                         | 2214393                                                                                         |
| Formula                                                   | C <sub>84</sub> H <sub>126</sub> O <sub>26</sub> N <sub>6</sub> Eu <sub>2</sub> Ti <sub>4</sub> | C <sub>84</sub> H <sub>126</sub> O <sub>26</sub> N <sub>6</sub> Eu <sub>2</sub> Ti <sub>4</sub> |
| <i>Mr</i>                                                 | 2103.40                                                                                         | 2103.40                                                                                         |
| Temperature/K                                             | 100.00(10)                                                                                      | 99.99(10)                                                                                       |
| Crystal color                                             | colorless                                                                                       | colorless                                                                                       |
| Crystal system                                            | monoclinic                                                                                      | monoclinic                                                                                      |
| Space group                                               | <i>C</i> 2                                                                                      | <i>C</i> 2                                                                                      |
| <i>a</i> /Å                                               | 26.7869(10)                                                                                     | 26.861(3)                                                                                       |
| <i>b</i> /Å                                               | 15.6539(4)                                                                                      | 15.6451(9)                                                                                      |
| <i>c</i> /Å                                               | 14.6425(6)                                                                                      | 14.6838(17)                                                                                     |
| $\alpha$ /°                                               | 90                                                                                              | 90                                                                                              |
| $\beta$ /°                                                | 125.081(6)                                                                                      | 125.433(15)                                                                                     |
| $\gamma$ /°                                               | 90                                                                                              | 90                                                                                              |
| <i>V</i> /Å <sup>3</sup>                                  | 5024.5(4)                                                                                       | 5027.9(11)                                                                                      |
| <i>Z</i>                                                  | 2                                                                                               | 2                                                                                               |
| $\rho_{\text{calc}}$ /g·cm <sup>-3</sup>                  | 1.390                                                                                           | 1.389                                                                                           |
| $\mu$ /mm <sup>-1</sup>                                   | 11.935                                                                                          | 11.927                                                                                          |
| $2\theta$ range/°                                         | 6.938-155.958                                                                                   | 6.946 to 152.006                                                                                |
| Reflections collected                                     | 35765                                                                                           | 37152                                                                                           |
| Data/restraints/parameters                                | 9962/415/688                                                                                    | 9428/657/696                                                                                    |
| Goodness-of-fit on F <sup>2</sup>                         | 1.073                                                                                           | 1.093                                                                                           |
| Final R indexes [ <i>I</i> ≥ 2σ( <i>I</i> )] <sup>a</sup> | R <sub>1</sub> = 0.0576, wR <sub>2</sub> = 0.1566                                               | R <sub>1</sub> = 0.0686, wR <sub>2</sub> = 0.1869                                               |
| Final R indexes [all data] <sup>b</sup>                   | R <sub>1</sub> = 0.0673, wR <sub>2</sub> = 0.1645                                               | R <sub>1</sub> = 0.0884, wR <sub>2</sub> = 0.2039                                               |
| Flack parameter                                           | 0.085(12)                                                                                       | 0.070(12)                                                                                       |

$${}^a R_1 = \sum (| |F_o| - |F_c| |) / \sum |F_o|; {}^b wR_2 = \{ \sum [w (F_o^2 - F_c^2)^2] / \sum [w(F_o^2)^2] \}^{1/2};$$

$$w = 1/[{}^2(F_o)^2 + (aP)^2 + bP] \text{ and } P = (F_o^2 + 2F_c^2)/3.$$

**Table S8.** Single crystal structure refinements of **3&4**.

| Clusters                                                           | 3                                                                                               | 4                                                                                               |
|--------------------------------------------------------------------|-------------------------------------------------------------------------------------------------|-------------------------------------------------------------------------------------------------|
| CCDC                                                               | 2214394                                                                                         | 2214395                                                                                         |
| Formula                                                            | C <sub>104</sub> H <sub>86</sub> O <sub>26</sub> N <sub>6</sub> Eu <sub>2</sub> Ti <sub>4</sub> | C <sub>104</sub> H <sub>86</sub> O <sub>26</sub> N <sub>6</sub> Eu <sub>2</sub> Ti <sub>4</sub> |
| <i>Mr</i>                                                          | 2303.28                                                                                         | 2303.28                                                                                         |
| Temperature/K                                                      | 100.01(13)                                                                                      | 100.00(13)                                                                                      |
| Crystal color                                                      | colorless                                                                                       | colorless                                                                                       |
| Crystal system                                                     | triclinic                                                                                       | triclinic                                                                                       |
| Space group                                                        | <i>P</i> 1                                                                                      | <i>P</i> 1                                                                                      |
| <i>a</i> /Å                                                        | 13.1002(2)                                                                                      | 13.0912(3)                                                                                      |
| <i>b</i> /Å                                                        | 14.6924(2)                                                                                      | 14.7170(4)                                                                                      |
| <i>c</i> /Å                                                        | 15.1253(2)                                                                                      | 15.1448(4)                                                                                      |
| $\alpha$ /°                                                        | 67.479(2)                                                                                       | 67.337(3)                                                                                       |
| $\beta$ /°                                                         | 89.6700(10)                                                                                     | 89.583(2)                                                                                       |
| $\gamma$ /°                                                        | 73.051(2)                                                                                       | 73.074(2)                                                                                       |
| <i>V</i> /Å <sup>3</sup>                                           | 2553.86(8)                                                                                      | 2557.66(13)                                                                                     |
| <i>Z</i>                                                           | 1                                                                                               | 1                                                                                               |
| $\rho_{\text{calc}}$ /g·cm <sup>-3</sup>                           | 1.498                                                                                           | 1.495                                                                                           |
| $\mu$ /mm <sup>-1</sup>                                            | 11.810                                                                                          | 11.792                                                                                          |
| <i>2</i> $\theta$ range/°                                          | 6.372-152.122                                                                                   | 6.37-148.65                                                                                     |
| Reflections collected                                              | 36250                                                                                           | 32698                                                                                           |
| Data/restraints/parameters                                         | 13766/993/1373                                                                                  | 13819/1170/1432                                                                                 |
| Goodness-of-fit on F <sup>2</sup>                                  | 1.106                                                                                           | 1.069                                                                                           |
| Final R indexes [ <i>I</i> ≥ 2 $\sigma$ ( <i>I</i> )] <sup>a</sup> | R <sub>1</sub> = 0.0494, wR <sub>2</sub> = 0.1343                                               | R <sub>1</sub> = 0.0619, wR <sub>2</sub> = 0.1695                                               |
| Final R indexes [all data] <sup>b</sup>                            | R <sub>1</sub> = 0.0565, wR <sub>2</sub> = 0.1405                                               | R <sub>1</sub> = 0.0654, wR <sub>2</sub> = 0.1734                                               |
| Flack parameter                                                    | 0.045(6)                                                                                        | 0.052(6)                                                                                        |

$${}^a R_1 = \sum (| |F_o| - |F_c| |) / \sum |F_o|; {}^b wR_2 = \{ \sum [w (F_o^2 - F_c^2)^2] / \sum [w(F_o^2)^2] \}^{1/2};$$

$$w = 1/[{}^2(F_o)^2 + (aP)^2 + bP] \text{ and } P = (F_o^2 + 2F_c^2)/3.$$

**Table S9.** Single crystal structure refinements of **5&6**.

| Clusters                                                  | 5                                                                                                | 6                                                                                                |
|-----------------------------------------------------------|--------------------------------------------------------------------------------------------------|--------------------------------------------------------------------------------------------------|
| CCDC                                                      | 2214396                                                                                          | 2214397                                                                                          |
| Formula                                                   | C <sub>144</sub> H <sub>166</sub> O <sub>26</sub> N <sub>4</sub> Eu <sub>2</sub> Ti <sub>4</sub> | C <sub>144</sub> H <sub>166</sub> O <sub>26</sub> N <sub>4</sub> Eu <sub>2</sub> Ti <sub>4</sub> |
| <i>Mr</i>                                                 | 2864.32                                                                                          | 2864.32                                                                                          |
| Temperature/K                                             | 100.00(13)                                                                                       | 100.00(13)                                                                                       |
| Crystal color                                             | colorless                                                                                        | colorless                                                                                        |
| Crystal system                                            | triclinic                                                                                        | triclinic                                                                                        |
| Space group                                               | <i>P</i> 1                                                                                       | <i>P</i> 1                                                                                       |
| <i>a</i> /Å                                               | 16.46530(10)                                                                                     | 17.4057(2)                                                                                       |
| <i>b</i> /Å                                               | 18.56690(10)                                                                                     | 21.3759(3)                                                                                       |
| <i>c</i> /Å                                               | 26.3060(2)                                                                                       | 22.6058(3)                                                                                       |
| $\alpha$ /°                                               | 76.7580(10)                                                                                      | 89.6750(10)                                                                                      |
| $\beta$ /°                                                | 81.8710(10)                                                                                      | 75.5190(10)                                                                                      |
| $\gamma$ /°                                               | 78.6230(10)                                                                                      | 70.3620(10)                                                                                      |
| <i>V</i> /Å <sup>3</sup>                                  | 7635.24(10)                                                                                      | 7641.52(18)                                                                                      |
| <i>Z</i>                                                  | 2                                                                                                | 2                                                                                                |
| $\rho_{\text{calc}}$ /g·cm <sup>-3</sup>                  | 1.246                                                                                            | 1.245                                                                                            |
| $\mu$ /mm <sup>-1</sup>                                   | 7.996                                                                                            | 7.989                                                                                            |
| $2\theta$ range/°                                         | 3.468-154.524                                                                                    | 4.052-148.912                                                                                    |
| Reflections collected                                     | 278762                                                                                           | 104418                                                                                           |
| Data/restraints/parameters                                | 57733/3694/3309                                                                                  | 39672/4970/3694                                                                                  |
| Goodness-of-fit on F <sup>2</sup>                         | 1.088                                                                                            | 1.073                                                                                            |
| Final R indexes [ <i>I</i> ≥ 2σ( <i>I</i> )] <sup>a</sup> | R <sub>1</sub> = 0.0473, wR <sub>2</sub> = 0.1203                                                | R <sub>1</sub> = 0.0320, wR <sub>2</sub> = 0.0808                                                |
| Final R indexes [all data] <sup>b</sup>                   | R <sub>1</sub> = 0.0527, wR <sub>2</sub> = 0.1233                                                | R <sub>1</sub> = 0.0348, wR <sub>2</sub> = 0.0820                                                |
| Flack parameter                                           | 0.054(3)                                                                                         | 0.040(2)                                                                                         |

$${}^a R_1 = \sum (| |F_o| - |F_c| |) / \sum |F_o|; {}^b wR_2 = \{ \sum [w (F_o^2 - F_c^2)^2] / \sum [w(F_o^2)] \}^{1/2};$$

$$w = 1/[{}^2(F_o)^2 + (aP)^2 + bP] \text{ and } P = (F_o^2 + 2F_c^2)/3.$$

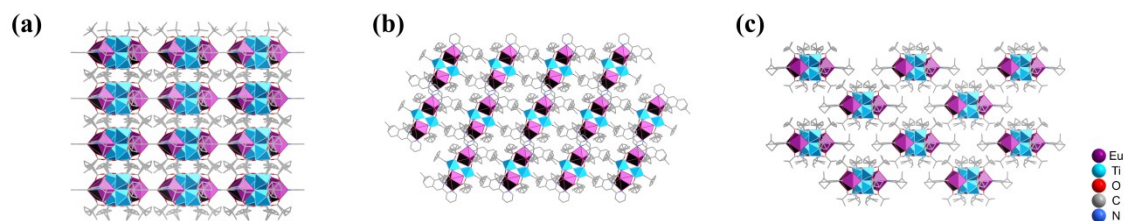

**Figure S5.** The packing structures of **1** in (a) a-axis, (b) b-axis and (c) c-axis.

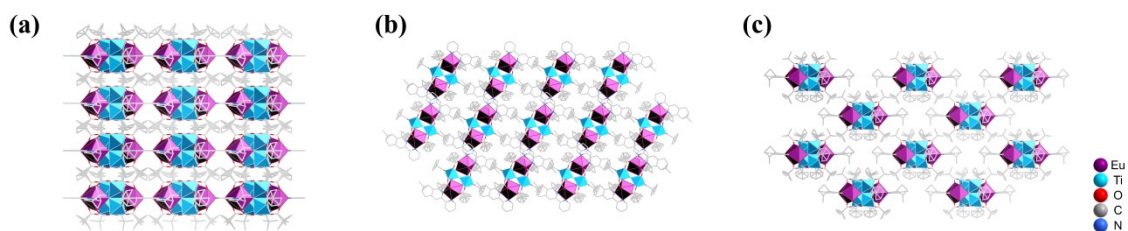

**Fig. S6** The packing structures of **2** in (a) a-axis, (b) b-axis and (c) c-axis.

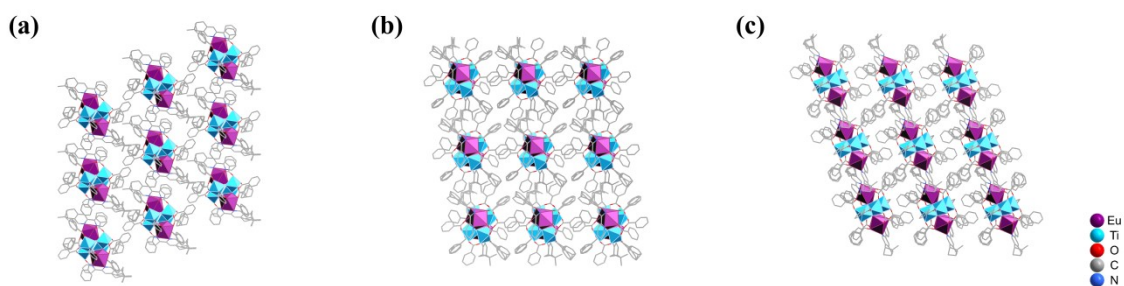

**Fig. S7** The packing structures of **3** in (a) a-axis, (b) b-axis and (c) c-axis.

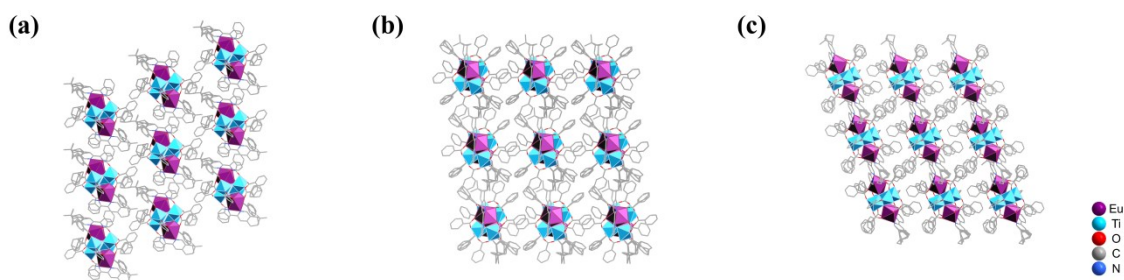

**Fig. S8** The packing structures of **4** in (a) a-axis, (b) b-axis and (c) c-axis.

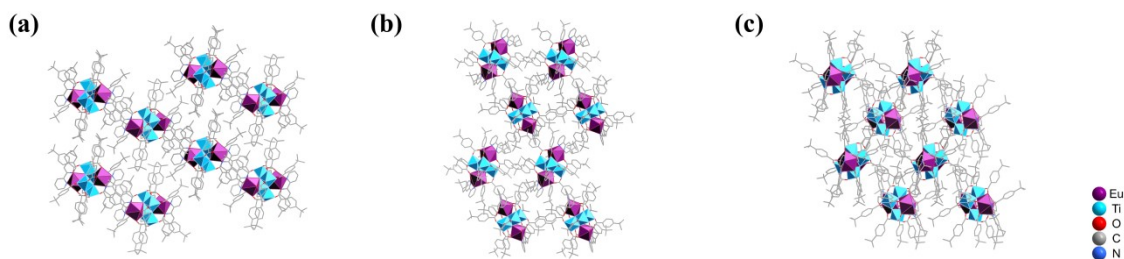

**Fig. S9** The packing structures of **5** in (a) a-axis, (b) b-axis and (c) c-axis.



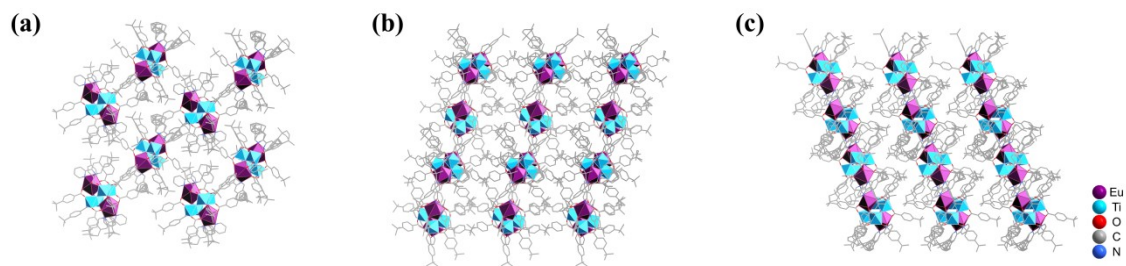

**Fig. S10** The packing structures of **6** in (a) a-axis, (b) b-axis and (c) c-axis.

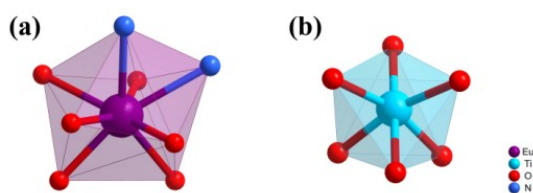

**Fig. S11** The coordination configurations of (a)  $\text{Eu}^{3+}$  ions in **1-6**; (b)  $\text{Ti}^{4+}$  ions in **1-6**. The  $\text{Eu}^{3+}$  ions are all eight-coordinated with six O atoms and two N atoms in **1-6**. The  $\text{Ti}^{4+}$  ions are all six-coordinated with six O atoms in **1-6**.

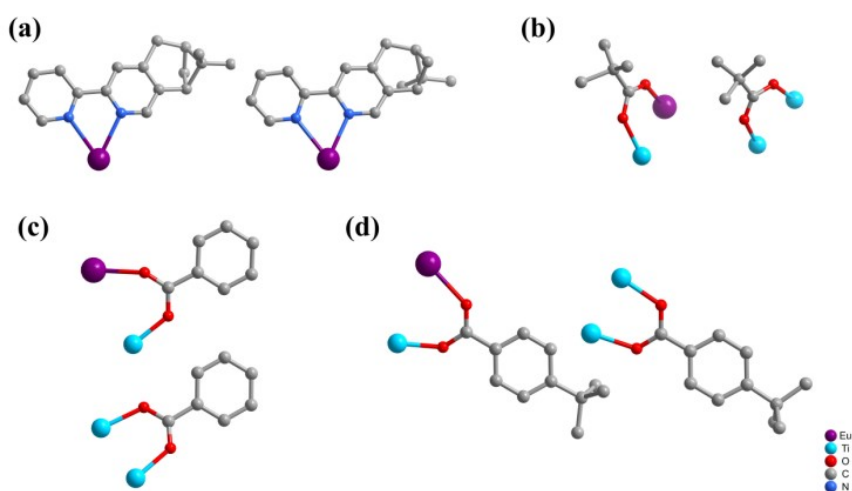

**Fig. S12** Coordination modes of (a) chiral pbpy ligands in **1-6**; (b)  $\text{pa}^-$  ligands in **1&2**; (c)  $\text{ba}^-$  ligands in **3&4**; (d)  $4\text{-tbba}^-$  ligands in **5&6**.

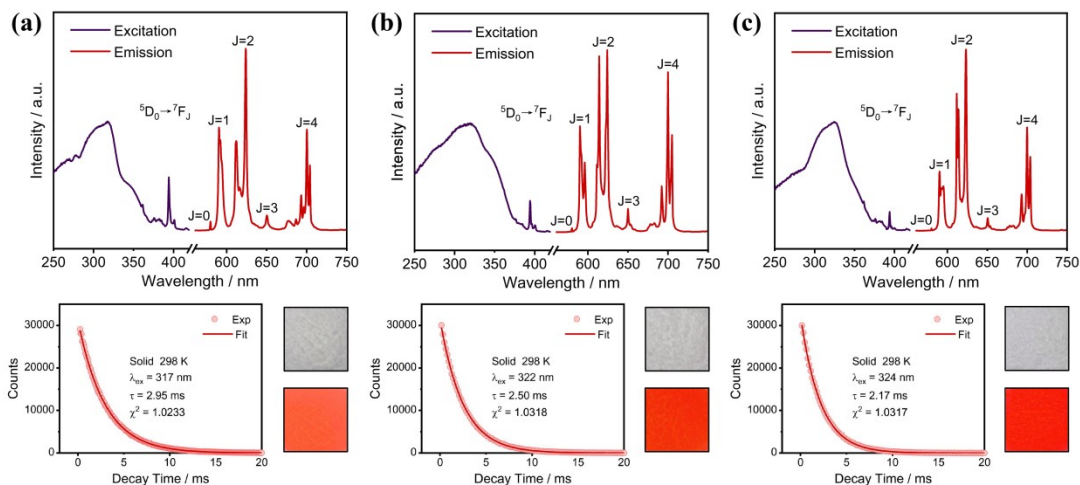

**Fig. S13** (a-c) Excitation and emission spectra, the excited-state decay curves and physical photographs of **2**, **4**, **6**.

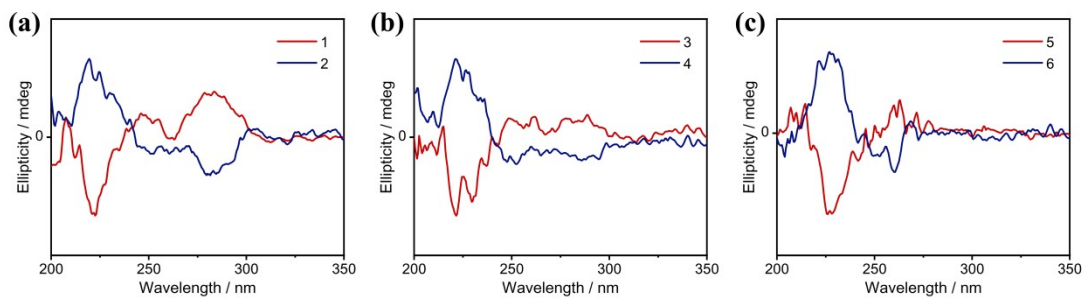

**Fig. S14** The CD spectra of (a) **1&2**; (b) **3&4**; (c) **5&6**.

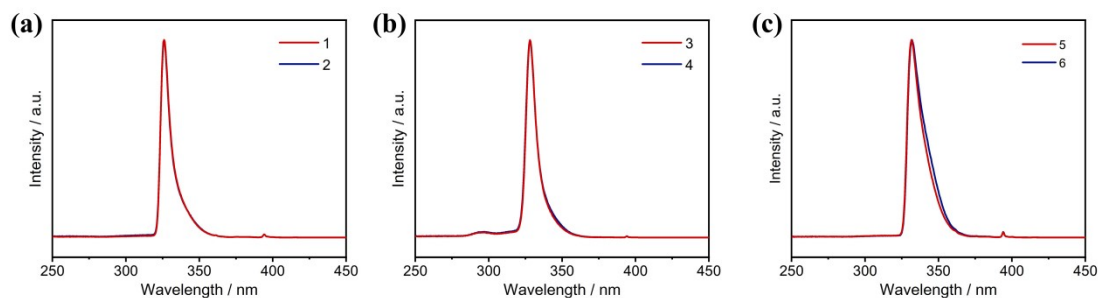

**Fig. S15.** The excitation spectra of  $\text{CH}_2\text{Cl}_2$  solutions of (a) **1&2**; (b) **3&4**; (c) **5&6**.

**Table S10.** List of representative metal-organic CPL emitters

| Classification                                                                                                                                                                                    | Compand                                                                                                                           | Metal Center(s)                                                                                | $ g_{lum} $                    | Ref.                          |
|---------------------------------------------------------------------------------------------------------------------------------------------------------------------------------------------------|-----------------------------------------------------------------------------------------------------------------------------------|------------------------------------------------------------------------------------------------|--------------------------------|-------------------------------|
| Coordination complexes                                                                                                                                                                            | Cs[Eu((+)-hfbc) <sub>4</sub> ]                                                                                                    | Eu <sup>3+</sup>                                                                               | 1.38                           | [2]                           |
|                                                                                                                                                                                                   | Eu( $\pm$ tfc)-tmpo                                                                                                               | Eu <sup>3+</sup>                                                                               | 1.2                            | [3]                           |
|                                                                                                                                                                                                   | Tb-Ph-PyBox                                                                                                                       | Tb <sup>3+</sup>                                                                               | 1.4 $\times$ 10 <sup>-1</sup>  | [4]                           |
|                                                                                                                                                                                                   | Sm(HFA) <sub>3</sub> (R)- <sup>i</sup> Pr-PyBox                                                                                   | Sm <sup>3+</sup>                                                                               | 1.8 $\times$ 10 <sup>-1</sup>  | [5]                           |
|                                                                                                                                                                                                   | CAACCuCl                                                                                                                          | Cu <sup>+</sup>                                                                                | 1.2 $\times$ 10 <sup>-3</sup>  | [6]                           |
|                                                                                                                                                                                                   | Ir(III)-NHC-helicene complexes                                                                                                    | Ir <sup>3+</sup>                                                                               | 3.7 $\times$ 10 <sup>-3</sup>  | [7]                           |
|                                                                                                                                                                                                   | [Cr(dqp) <sub>2</sub> ] <sup>3+</sup>                                                                                             | Cr <sup>3+</sup>                                                                               | 2 $\times$ 10 <sup>-1</sup>    | [8]                           |
|                                                                                                                                                                                                   | (R/S)-PtBox/PtN                                                                                                                   | Pt <sup>2+</sup>                                                                               | 6.4 $\times$ 10 <sup>-2</sup>  | [9]                           |
|                                                                                                                                                                                                   | Metal clusters                                                                                                                    | (Au <sub>4</sub> L <sub>4</sub> ) <sub>n</sub> /(Au <sub>4</sub> D <sub>4</sub> ) <sub>n</sub> | Au <sup>+</sup>                | 7 $\times$ 10 <sup>-3</sup>   |
| [Au <sub>6</sub> (C <sub>2</sub> C <sub>10</sub> H <sub>17</sub> O) <sub>4</sub> (PPh <sub>2</sub> C <sub>3</sub> H <sub>6</sub> PPh <sub>2</sub> ) <sub>2</sub> ](PF <sub>6</sub> ) <sub>2</sub> |                                                                                                                                   | Au <sup>+</sup>                                                                                | 6 $\times$ 10 <sup>-3</sup>    | [11]                          |
| Ag <sub>6</sub> L <sub>6</sub> /D <sub>6</sub>                                                                                                                                                    |                                                                                                                                   | Ag <sup>+</sup>                                                                                | 4.42 $\times$ 10 <sup>-3</sup> | [12]                          |
| R/S-Ag <sub>17</sub>                                                                                                                                                                              |                                                                                                                                   | Ag <sup>+</sup>                                                                                | 1.2 $\times$ 10 <sup>-3</sup>  | [13]                          |
| [Cu <sub>14</sub> (R/S-DPM) <sub>8</sub> ](PF <sub>6</sub> ) <sub>6</sub>                                                                                                                         |                                                                                                                                   | Cu <sup>+</sup>                                                                                | 1 $\times$ 10 <sup>-2</sup>    | [14]                          |
| Cu <sub>3</sub> (BINAP) <sub>3</sub> CO <sub>3</sub> ( <sup>t</sup> BuSO <sub>3</sub> )                                                                                                           |                                                                                                                                   | Cu <sup>+</sup>                                                                                | 2 $\times$ 10 <sup>-2</sup>    | [15]                          |
| [Tb <sub>9</sub> (sal-(S)-Bt) <sub>16</sub> ( $\mu$ -OH) <sub>10</sub> ] <sup>+</sup> [NO <sub>3</sub> ] <sup>-</sup>                                                                             |                                                                                                                                   | Tb <sup>3+</sup>                                                                               | 1 $\times$ 10 <sup>-2</sup>    | [16]                          |
| Coordination polymers                                                                                                                                                                             |                                                                                                                                   | [Eu(+/-tfc) <sub>3</sub> (dppb)] <sub>n</sub>                                                  | Eu <sup>3+</sup>               | 1.7 $\times$ 10 <sup>-1</sup> |
|                                                                                                                                                                                                   | DSM@TbBTC MOF                                                                                                                     | Tb <sup>3+</sup>                                                                               | 2.5 $\times$ 10 <sup>-3</sup>  | [18]                          |
|                                                                                                                                                                                                   | R-/S-ZIF                                                                                                                          | Zn <sup>2+</sup>                                                                               | 5.5 $\times$ 10 <sup>-3</sup>  | [19]                          |
|                                                                                                                                                                                                   | Cd-TCPA MOF                                                                                                                       | Cd <sup>2+</sup>                                                                               | 2.7 $\times$ 10 <sup>-3</sup>  | [20]                          |
|                                                                                                                                                                                                   | [Ba <sub>2</sub> ( $\mu$ -D/L-pyro) <sub>2</sub> ( $\mu$ <sub>4</sub> -NO <sub>3</sub> )( $\mu$ <sub>3</sub> -form)] <sub>n</sub> | Ba <sup>2+</sup>                                                                               | 1 $\times$ 10 <sup>-3</sup>    | [21]                          |
| Metal-organic cages                                                                                                                                                                               | [Eu <sub>4</sub> (L <sub>1</sub> ) <sub>6</sub> ](OTf) <sub>12</sub>                                                              | Eu <sup>3+</sup>                                                                               | 1.6 $\times$ 10 <sup>-1</sup>  | [22]                          |
|                                                                                                                                                                                                   | (Eu <sub>4</sub> L <sub>4</sub> )(R/S-BINAPO) <sub>4</sub>                                                                        | Eu <sup>3+</sup>                                                                               | 2 $\times$ 10 <sup>-1</sup>    | [23]                          |
|                                                                                                                                                                                                   | Zn <sub>6</sub> L <sub>6</sub> (SO <sub>4</sub> ) <sub>4</sub> cages                                                              | Zn <sup>2+</sup>                                                                               | 4 $\times$ 10 <sup>-3</sup>    | [24]                          |
|                                                                                                                                                                                                   | Pd <sub>4</sub> Ru <sub>8</sub> (MOC-52)                                                                                          | Pd <sup>2+</sup> , Ru <sup>2+</sup>                                                            | 3.9 $\times$ 10 <sup>-3</sup>  | [25]                          |
| Helicates                                                                                                                                                                                         | helical aggregate Cs[Eu((+)-hfbc) <sub>4</sub> ]                                                                                  | Eu <sup>3+</sup>                                                                               | 1.45                           | [26]                          |
|                                                                                                                                                                                                   | Eu <sub>2</sub> L <sub>3</sub> (L') <sub>2</sub>                                                                                  | Eu <sup>3+</sup>                                                                               | 1.12 $\times$ 10 <sup>-1</sup> | [27]                          |
|                                                                                                                                                                                                   | [(R)- or (S)- <sup>i</sup> Pr-Pybox] <sub>8</sub> (Eu <sup>III</sup> ) <sub>8</sub> (THP) <sub>8</sub>                            | Eu <sup>3+</sup>                                                                               | 1.25                           | [28]                          |
|                                                                                                                                                                                                   | ALPHY                                                                                                                             | Al <sup>3+</sup>                                                                               | 4 $\times$ 10 <sup>-3</sup>    | [29]                          |
|                                                                                                                                                                                                   | Zn(Phena-dpm) <sub>2</sub>                                                                                                        | Zn <sup>2+</sup>                                                                               | 2.2 $\times$ 10 <sup>-2</sup>  | [30]                          |
| Metallacycles                                                                                                                                                                                     | Pt (II) metallacycles                                                                                                             | Pt <sup>2+</sup>                                                                               | 2.3 $\times$ 10 <sup>-3</sup>  | [31]                          |
|                                                                                                                                                                                                   | metallacycles M-S/R                                                                                                               | Pt <sup>2+</sup>                                                                               | 1.4 $\times$ 10 <sup>-2</sup>  | [32]                          |
|                                                                                                                                                                                                   | Eu <sub>2</sub> (Pt-L) <sub>2</sub> (L <sup>R/S</sup> ) <sub>2</sub>                                                              | Eu <sup>3+</sup>                                                                               | 5.8 $\times$ 10 <sup>-2</sup>  | [33]                          |

The main parameter to measure the CPL property (degree of asymmetry) is the luminescence asymmetry factor ( $g_{lum}$ ,  $-2 \leq g_{lum} \leq 2$ ):

$$g_{lum} = \frac{\Delta I}{I} = \frac{I_L - I_R}{\frac{I_L + I_R}{2}} = \frac{2(I_L - I_R)}{I_L + I_R}$$

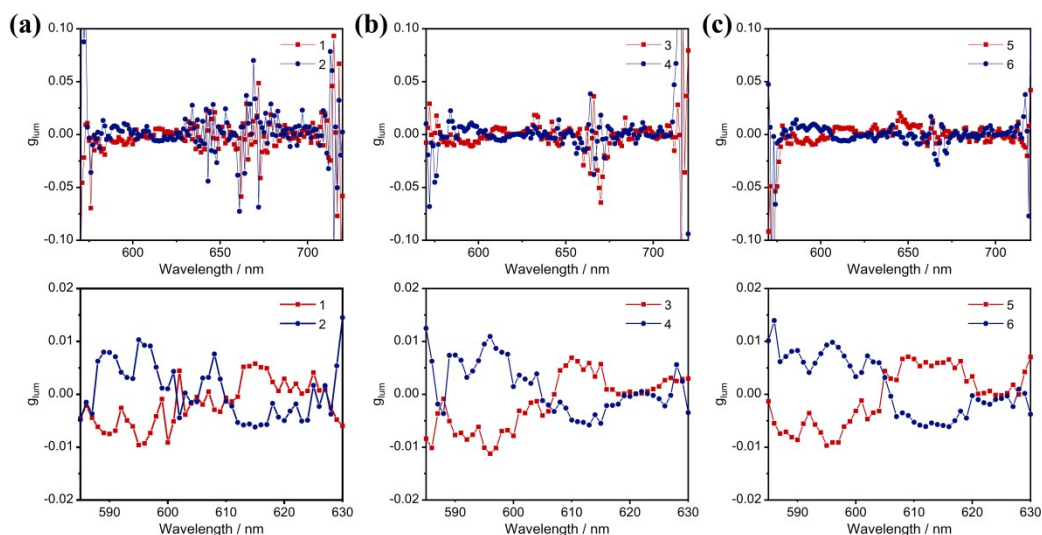

**Fig. S16** The  $g_{lum}$  versus wavelength of (a) 1&2; (b) 3&4; (c) 5&6.

**Table S11.** Correspondence between  $g_{lum}$  and wavelengths of 1-6.

| Clusters | Wavelength ( ${}^7F_J$ ) | $g_{lum}$ | Clusters | Wavelength ( ${}^7F_J$ ) | $g_{lum}$ |
|----------|--------------------------|-----------|----------|--------------------------|-----------|
| 1        | 590 nm (J=1)             | -0.0082   | 2        | 590 nm (J=1)             | 0.0089    |
|          | 595 nm (J=1)             | -0.0096   |          | 595 nm (J=1)             | 0.0103    |
|          | 615 nm (J=2)             | 0.0058    |          | 615 nm (J=2)             | -0.0062   |
| 3        | 590 nm (J=1)             | -0.0091   | 4        | 590 nm (J=1)             | 0.0084    |
|          | 595 nm (J=1)             | -0.0101   |          | 595 nm (J=1)             | 0.0095    |
|          | 615 nm (J=2)             | 0.0057    |          | 615 nm (J=2)             | -0.0055   |
| 5        | 590 nm (J=1)             | -0.0086   | 6        | 590 nm (J=1)             | 0.0083    |
|          | 595 nm (J=1)             | -0.0097   |          | 595 nm (J=1)             | 0.0093    |
|          | 615 nm (J=2)             | 0.0060    |          | 615 nm (J=2)             | -0.0059   |

The  $|g_{lum}|$  values for  ${}^5D_0 \rightarrow {}^7F_1$  transitions of 1-6 are all determined to be approximately  $1 \times 10^{-2}$ , and for  ${}^5D_0 \rightarrow {}^7F_2$  transitions of 1-6 are all found to be approximately  $6 \times 10^{-3}$ . Compared to other metal-organic CPL emitters, the  $g_{lum}$  values we observed are moderate.

The  $B_{CPL}$  (CPL brightness) of the selected lanthanide transition is calculated following this equation provide by Francesco Zinna <sup>[34]</sup>:

$$B_{CPL} = \beta_i \times \varepsilon_\lambda \times \phi \times \frac{|g_{lum}|}{2}$$

$\beta_i$ : branching ratio of transition

$\varepsilon_\lambda$ : the molar extinction coefficient measured at the excitation wavelength ( $\lambda$ ),  $\varepsilon_\lambda = A/lc$

$\Phi$ : emission quantum yield

$g_{lum}$ : dissymmetry factor

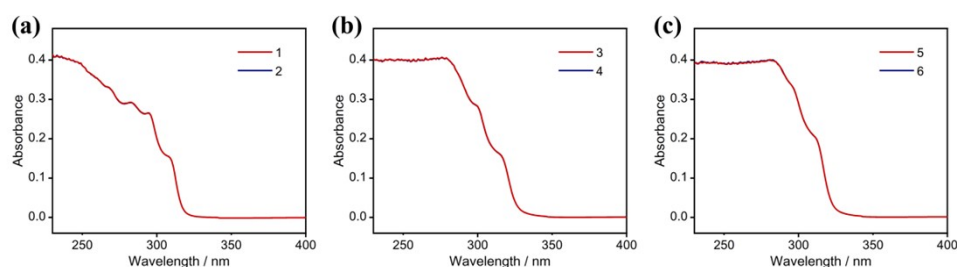

**Fig. S17** UV-visible absorption spectra of  $CH_2Cl_2$  solutions of (a) **1&2**; (b) **3&4**; (c) **5&6**.

Concentration of solution (c):  $1 \times 10^{-5}$  M; Cross section size of cuvette: 1 cm  $\times$  1 cm (l).

**Table S12.** Photophysical parameters and  $B_{CPL}$  of  $CH_2Cl_2$  solutions of **1-6**.

| Cluster  | $\varepsilon / M^{-1} \cdot cm^{-1}$<br>( $\lambda_{abs} / nm$ ) | $\Phi$ | ${}^7F_J$ | $ g_{lum} $<br>( $\lambda / nm$ ) | $\beta$ | $B_{CPL} / M^{-1} \cdot cm^{-1}$ |
|----------|------------------------------------------------------------------|--------|-----------|-----------------------------------|---------|----------------------------------|
| <b>1</b> | 1435.9<br>(326 nm)                                               | 0.12   | J=1       | 0.0096 (595 nm)                   | 0.19    | 0.16                             |
|          |                                                                  |        | J=2       | 0.0058 (615 nm)                   | 0.62    | 0.31                             |
| <b>2</b> | 1438.3<br>(326 nm)                                               | 0.10   | J=1       | 0.0103 (595 nm)                   | 0.19    | 0.14                             |
|          |                                                                  |        | J=2       | 0.0062 (615 nm)                   | 0.62    | 0.28                             |
| <b>3</b> | 1258.2<br>(328 nm)                                               | 0.43   | J=1       | 0.0101 (595 nm)                   | 0.20    | 0.54                             |
|          |                                                                  |        | J=2       | 0.0057 (615 nm)                   | 0.62    | 0.93                             |
| <b>4</b> | 1261.8<br>(328 nm)                                               | 0.44   | J=1       | 0.0095 (595 nm)                   | 0.20    | 0.53                             |
|          |                                                                  |        | J=2       | 0.0055 (615 nm)                   | 0.62    | 0.94                             |
| <b>5</b> | 975.1<br>(332 nm)                                                | 0.58   | J=1       | 0.0097 (595 nm)                   | 0.19    | 0.52                             |
|          |                                                                  |        | J=2       | 0.0060 (615 nm)                   | 0.62    | 1.05                             |
| <b>6</b> | 977.8<br>(332 nm)                                                | 0.61   | J=1       | 0.0093 (595 nm)                   | 0.19    | 0.53                             |
|          |                                                                  |        | J=2       | 0.0059 (615 nm)                   | 0.62    | 1.09                             |

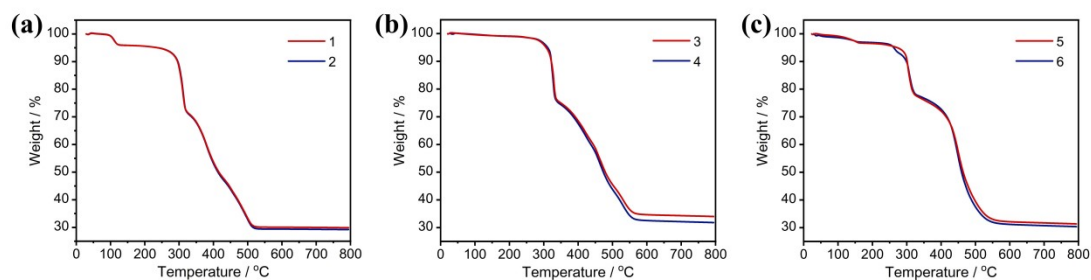

**Fig. S18** The TGA curves of (a) 1&2; (b) 3&4; (c) 5&6.

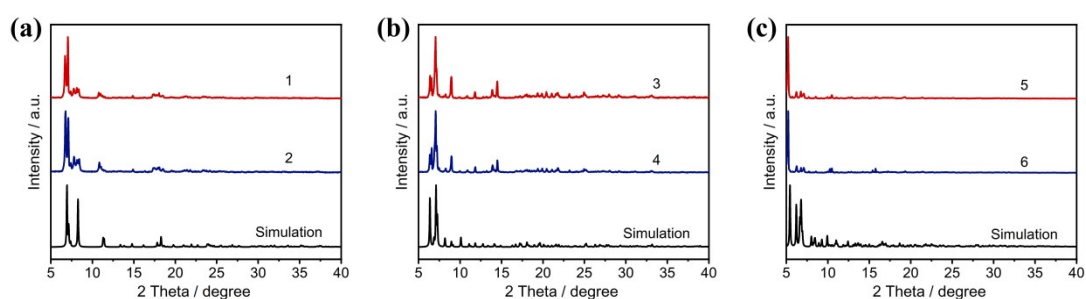

**Fig. S19** The PXRD of (a) 1&2; (b) 3&4; (c) 5&6.

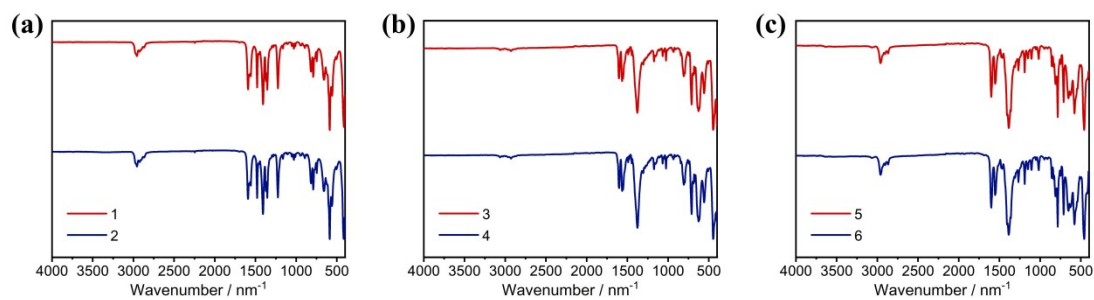

**Fig. S20** The FT-IR of (a) 1&2; (b) 3&4; (c) 5&6.

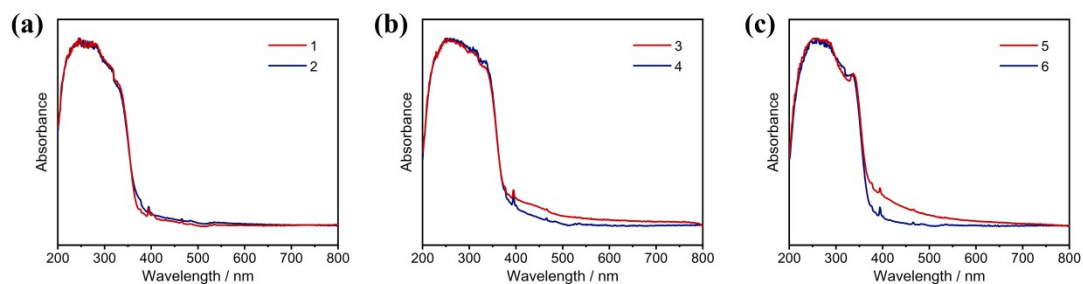

**Fig. S21** The DRS of (a) 1&2; (b) 3&4; (c) 5&6.

**Table S13.** Selected bond distances (Å) of **1**.

| Atom-Atom | Length/Å  | Atom-Atom | Length/Å  |
|-----------|-----------|-----------|-----------|
| Eu1—O6    | 2.396(5)  | Eu1—O8    | 2.390(10) |
| Eu1—O5    | 2.363(10) | Eu1—N1    | 2.596(7)  |
| Eu1—N4    | 2.671(1)  | Ti1—O1    | 2.086(10) |
| Ti1—O6    | 1.925(9)  | Ti1—O10   | 1.816(5)  |
| Ti1—O14   | 1.869(10) | Ti1—O9    | 2.029(10) |
| Ti1—O3    | 2.030(9)  | Ti2—O4    | 2.018(10) |
| Ti2—O6    | 1.897(10) | Ti2—O12   | 2.034(11) |
| Ti2—O14   | 1.880(10) | Ti2—O11   | 1.809(5)  |
| Ti2—O13   | 2.103(10) |           |           |

**Table S14.** Selected bond angles (°) of **1**.

| Atom-Atom-Atom | angles / ° | Atom-Atom-Atom | angles / ° |
|----------------|------------|----------------|------------|
| Ti1—O6—Eu1     | 122.9(4)   | Ti2—O6—Eu1     | 122.6(4)   |
| Ti2—O6—Ti1     | 96.0(2)    | Ti1—O14—Ti2    | 98.5(2)    |

**Table S15.** Selected bond distances (Å) of **2**.

| Atom-Atom | Length/Å  | Atom-Atom | Length/Å  |
|-----------|-----------|-----------|-----------|
| Eu1—O6    | 2.355(13) | Eu1—O11   | 2.419(12) |
| Eu1—O12   | 2.395(7)  | Eu1—N1    | 2.666(8)  |
| Eu1—N3    | 2.595(9)  | Ti1—O10   | 1.823(6)  |
| Ti1—O12   | 1.898(10) | Ti1—O14   | 2.032(11) |
| Ti1—O7    | 1.881(11) | Ti1—O2    | 2.011(11) |
| Ti1—O5    | 2.096(12) | Ti2—O1    | 2.098(12) |
| Ti2—O8    | 2.029(11) | Ti2—O12   | 1.910(12) |
| Ti2—O7    | 1.880(11) | Ti2—O9    | 2.021(12) |
| Ti2—O3    | 1.805(5)  |           |           |

**Table S16.** Selected bond angles (°) of **2**.

| Atom-Atom-Atom | angles / ° | Atom-Atom-Atom | angles / ° |
|----------------|------------|----------------|------------|
| Ti1—O12—Eu1    | 123.7(5)   | Ti2—O12—Eu1    | 121.4(5)   |
| Ti2—O7—Ti1     | 98.0(3)    | Ti1—O12—Ti2    | 96.4(3)    |

**Table S17.** Selected bond distances (Å) of **3**.

| Atom-Atom | Length/Å  | Atom-Atom | Length/Å  |
|-----------|-----------|-----------|-----------|
| Eu1—O10   | 2.352(8)  | Eu1—O12   | 2.391(9)  |
| Eu1—O7    | 2.418(8)  | Eu1—O9    | 2.395(8)  |
| Eu1—N6    | 2.564(11) | Eu1—N3    | 2.608(11) |
| Eu1—O21   | 2.402(9)  | Eu1—O23   | 2.350(8)  |
| Eu2—O4    | 2.330(9)  | Eu2—O8    | 2.417(10) |
| Eu2—O18   | 2.427(9)  | Eu2—O26   | 2.421(11) |
| Eu2—N1    | 2.600(12) | Eu2—N4    | 2.570(9)  |
| Eu2—O19   | 2.351(7)  | Eu2—O11   | 2.357(9)  |
| Ti1—O4    | 1.874(10) | Ti1—O10   | 1.912(9)  |
| Ti1—O22   | 2.030(9)  | Ti1—O13   | 2.132(9)  |
| Ti1—O15   | 2.053(10) | Ti1—O17   | 1.829(9)  |
| Ti4—O4    | 1.904(9)  | Ti4—O10   | 1.922(9)  |
| Ti4—O16   | 1.787(10) | Ti4—O5    | 2.119(9)  |
| Ti4—O3    | 2.025(9)  | Ti4—O25   | 2.036(10) |
| Ti2—O1    | 2.012(10) | Ti2—O6    | 2.014(8)  |
| Ti2—O14   | 2.103(9)  | Ti2—O17   | 1.801(10) |
| Ti2—O19   | 1.919(9)  | Ti2—O23   | 1.920(9)  |
| Ti3—O16   | 1.838(9)  | Ti3—O20   | 2.112(9)  |
| Ti3—O24   | 2.028(10) | Ti3—O2    | 2.038(9)  |
| Ti3—O19   | 1.914(8)  | Ti3—O23   | 1.847(10) |



**Table S18.** Selected bond angles (°) of **3**.

| Atom-Atom-Atom | angles / ° | Atom-Atom-Atom | angles / ° |
|----------------|------------|----------------|------------|
| Ti1—O4—Eu2     | 125.2(4)   | Ti1—O4—Ti4     | 98.1(4)    |
| Ti4—O4—Eu2     | 124.6(5)   | Ti1—O10—Eu2    | 123.4(4)   |
| Ti1—O10—Ti4    | 96.2(4)    | Ti4—O10—Eu1    | 122.8(4)   |
| Ti4—O16—Ti3    | 143.1(5)   | Ti2—O17—Ti1    | 143.3(6)   |
| Ti2—O19—Eu2    | 122.7(4)   | Ti3—O19—Eu2    | 124.2(4)   |
| Ti3—O19—Ti2    | 96.7(4)    | Ti2—O23—Eu1    | 122.3(5)   |
| Ti3—O23—Eu1    | 126.3(4)   | Ti3—O23—Ti2    | 98.9(4)    |

**Table S19.** Selected bond distances (Å) of **4**.

| Atom-Atom | Length/Å  | Atom-Atom | Length/Å  |
|-----------|-----------|-----------|-----------|
| Eu1—O8    | 2.453(9)  | Eu1—O14   | 2.330(8)  |
| Eu1—O20   | 2.351(8)  | Eu1—O15   | 2.416(9)  |
| Eu1—N6    | 2.568(11) | Eu1—N3    | 2.599(12) |
| Eu1—O3    | 2.422(10) | Eu1—O25   | 2.366(9)  |
| Eu2—O1    | 2.375(10) | Eu2—O6    | 2.414(8)  |
| Eu2—O22   | 2.373(8)  | Eu2—O24   | 2.400(9)  |
| Eu2—N1    | 2.617(11) | Eu2—N4    | 2.557(9)  |
| Eu2—O9    | 2.336(8)  | Eu2—O5    | 2.380(8)  |
| Ti1—O4    | 2.021(8)  | Ti1—O14   | 1.898(8)  |
| Ti1—O22   | 1.932(8)  | Ti1—O17   | 1.782(10) |
| Ti1—O19   | 2.022(9)  | Ti1—O21   | 2.090(10) |
| Ti4—O12   | 2.045(8)  | Ti4—O14   | 1.871(9)  |
| Ti4—O18   | 1.841(10) | Ti4—O22   | 1.895(8)  |
| Ti4—O7    | 2.138(10) | Ti4—O2    | 2.015(10) |
| Ti2—O16   | 2.110(10) | Ti2—O20   | 1.916(8)  |
| Ti2—O26   | 2.034(9)  | Ti2—O17   | 1.834(10) |
| Ti2—O9    | 1.868(10) | Ti2—O11   | 2.031(9)  |
| Ti3—O10   | 2.122(11) | Ti3—O18   | 1.796(10) |
| Ti3—O20   | 1.905(8)  | Ti3—O13   | 2.021(9)  |
| Ti3—O9    | 1.913(8)  | Ti3—O23   | 2.016(8)  |

**Table S20.** Selected bond angles (°) of **4**.

| Atom-Atom-Atom | angles / ° | Atom-Atom-Atom | angles / ° |
|----------------|------------|----------------|------------|
| Ti1—O14—Eu1    | 124.7(4)   | Ti4—O14—Eu1    | 125.8(4)   |
| Ti4—O14—Ti1    | 98.5(4)    | Ti3—O18—Ti4    | 142.6(5)   |
| Ti2—O20—Eu1    | 124.1(4)   | Ti3—O20—Eu1    | 123.4(4)   |
| Ti3—O20—Ti2    | 96.7(4)    | Ti1—O22—Eu2    | 123.4(4)   |
| Ti4—O22—Eu2    | 123.4(4)   | Ti4—O22—Ti1    | 96.5(4)    |
| Ti1—O17—Ti2    | 143.5(5)   | Ti2—O9—Eu2     | 126.0(4)   |
| Ti2—O9—Eu3     | 98.1(4)    | Ti3—O9—Eu2     | 123.2(4)   |

**Table S21.** Selected bond distances (Å) of **5**.

| Atom-Atom | Length/Å | Atom-Atom | Length/Å |
|-----------|----------|-----------|----------|
| Eu1—O1    | 2.386(6) | Eu1—O18   | 2.432(6) |
| Eu1—O36   | 2.329(5) | Eu1—O37   | 2.372(5) |
| Eu1—N1    | 2.598(7) | Eu1—N14   | 2.581(7) |
| Eu1—O21   | 2.375(6) | Eu1—O11   | 2.415(6) |
| Eu3—O26   | 2.405(5) | Eu3—O38   | 2.358(6) |
| Eu3—O48   | 2.358(6) | Eu3—O86   | 2.335(6) |
| Eu3—O43   | 2.404(6) | Eu3—O3    | 2.400(6) |
| Eu3—N10   | 2.558(8) | Eu3—N3    | 2.609(7) |
| Ti2—O1    | 1.912(6) | Ti2—O30   | 2.087(6) |
| Ti2—O48   | 1.887(6) | Ti2—O2    | 2.056(6) |
| Ti2—O35   | 1.825(6) | Ti2—O47   | 2.079(6) |
| Ti6—O15   | 2.029(6) | Ti6—O31   | 2.047(6) |
| Ti6—O35   | 1.800(6) | Ti6—O37   | 1.899(6) |
| Ti6—O19   | 2.120(6) | Ti6—O3    | 1.889(6) |
| Ti7—O1    | 1.918(6) | Ti7—O42   | 2.110(6) |
| Ti7—O48   | 1.893(5) | Ti7—O13   | 1.799(6) |
| Ti7—O27   | 2.021(6) | Ti7—O29   | 2.039(6) |
| Ti8—O8    | 2.072(6) | Ti8—O44   | 2.037(6) |
| Ti8—O13   | 1.833(6) | Ti8—O37   | 1.856(6) |
| Ti8—O41   | 2.086(6) | Ti8—O3    | 1.902(5) |

**Table S22.** Selected bond angles (°) of **5**.

| Atom-Atom-Atom | angles / ° | Atom-Atom-Atom | angles / ° |
|----------------|------------|----------------|------------|
| Ti2—O1—Eu1     | 125.0(3)   | Ti2—O1—Ti7     | 96.3(3)    |
| Ti7—O1—Eu1     | 122.2(3)   | Ti2—O48—Eu3    | 124.2(3)   |
| Ti2—O48—Ti7    | 98.0(3)    | Ti7—O48—Eu3    | 124.6(3)   |
| Ti7—O13—Ti8    | 142.4(3)   | Ti6—O37—Eu1    | 124.6(3)   |
| Ti8—O37—Eu1    | 124.3(3)   | Ti8—O37—Ti6    | 99.0(3)    |
| Ti6—O3—Eu3     | 122.2(3)   | Ti6—O3—Ti8     | 97.7(3)    |
| Ti8—O3—Eu3     | 124.9(3)   |                |            |

**Table S23.** Selected bond distances (Å) of **6**.

| Atom-Atom | Length/Å | Atom-Atom | Length/Å |
|-----------|----------|-----------|----------|
| Eu1—O52   | 2.424(4) | Eu1—O13   | 2.402(4) |
| Eu1—O2    | 2.396(4) | Eu1—O17   | 2.409(4) |
| Eu1—N4    | 2.584(4) | Eu1—N8    | 2.364(3) |
| Eu1—O47   | 2.364(3) | Eu1—O25   | 2.336(3) |
| Eu3—O1    | 2.373(3) | Eu3—O8    | 2.329(3) |
| Eu3—O32   | 2.410(4) | Eu3—O39   | 2.408(4) |
| Eu3—O41   | 2.421(4) | Eu3—O21   | 2.401(4) |
| Eu3—N12   | 2.555(5) | Eu3—N9    | 2.583(5) |
| Ti1—O1    | 1.905(4) | Ti1—O4    | 2.063(3) |
| Ti1—O12   | 1.809(4) | Ti1—O26   | 2.102(4) |
| Ti1—O42   | 2.030(4) | Ti1—O25   | 1.888(3) |
| Ti2—O8    | 1.870(4) | Ti2—O12   | 1.870(4) |
| Ti2—O18   | 2.105(4) | Ti2—O22   | 2.011(4) |
| Ti2—O43   | 2.011(4) | Ti2—O47   | 1.919(3) |
| Ti7—O8    | 1.889(4) | Ti7—O19   | 2.110(4) |
| Ti7—O5    | 1.801(4) | Ti7—O11   | 2.012(4) |
| Ti7—O47   | 1.912(4) | Ti7—O51   | 2.061(3) |
| Ti8—O1    | 1.921(3) | Ti8—O20   | 2.013(3) |
| Ti8—O5    | 2.013(3) | Ti8—O23   | 2.028(4) |
| Ti8—O3    | 2.116(4) | Ti8—O25   | 1.870(4) |

**Table S24.** Selected bond angles (°) of **6**.

| Atom-Atom-Atom | angles / ° | Atom-Atom-Atom | angles / ° |
|----------------|------------|----------------|------------|
| Ti1—O1—Eu3     | 121.81(18) | Ti1—O1—Ti8     | 96.18(15)  |
| Ti8—O1—Eu3     | 124.63(17) | Ti2—O8—Eu3     | 123.31(17) |
| Ti2—O8—Ti7     | 98.90(16)  | Ti7—O8—Eu3     | 125.47(19) |
| Ti1—O12—Ti2    | 142.4(2)   | Ti2—O47—Eu1    | 125.41(17) |
| Ti7—O47—Eu1    | 121.62(17) | Ti7—O47—Ti2    | 96.38(15)  |
| Ti1—O25—Eu1    | 126.08(19) | Ti8—O25—Eu1    | 126.08(19) |
| Ti8—O25—Ti1    | 98.56(16)  |                |            |

## Reference

- [1] (a) P. Hayoz and A. v. Zelewsky, *Tetrahedron Lett.*, 1992, **33**, 5165-5168. (b) P. Hayoz, A. V. Zelewsky and H. Stoeckli-Evans, *J. Am. Chem. Soc.*, 1993, **115**, 5111-5114. (c) X.-L. Li, Y. Zheng, J.-L. Zuo, Y. Song and X.-Z. You, *Polyhedron*, 2007, **26**, 5257-5262. (d) K. D. Oyler, F. J. Coughlin and S. Bernhard, *J. Am. Chem. Soc.*, 2007, **129**, 210-217.
- [2] J. L. Lunkley, D. Shirotni, K. Yamanari, S. Kaizaki and G. Muller, *J. Am. Chem. Soc.*, 2008, **130**, 13814-13815.
- [3] Y. Kitagawa, S. Wada, M. D. J. Islam, K. Saita, M. Gon, K. Fushimi, K. Tanaka, S. Maeda and Y. Hasegawa, *Commun. Chem.*, 2020, **3**, 119–123.
- [4] L. Arrico, C. Benetti and L. D. Bari, *ChemPhotoChem*, 2021, **5**, 815-821.
- [5] M. Górecki, L. Carpita, L. Arrico, F. Zinna and L. D. Bari, *Dalton Trans.*, 2018, **47**, 7166-7177.
- [6] M. Deng, N. F. M. Mukthar, N. D. Schley and G. I. Ung, *Angew. Chem.*, 2020, **59**, 1228-1231.
- [7] N. Hellou, M. Srebro-Hooper, L. Favereau, F. Zinna, E. Caytan, L. c. Toupet, V. Dorcet, M. Jean, N. Vanthuyne, J. A. Gareth Williams, L. D. Bari, J. Autschbach and J. Crassous, *Angew. Chem.*, 2017, **56**, 8236-8239.
- [8] J.-R. J. nez, B. Doistau, C. M. Cruz, C. Besnard, J. M. Cuerva, A. G. Campaña and C. Piguet, *J. Am. Chem. Soc.*, 2019, **141**, 13244-13252.
- [9] G. Park, H. Kim, H. Yang, K. R. Park, I. Song, J. H. Oh, C. Kim and Y. You, *Chem. Sci.*, 2019, **10**, 1294-1301.

- [10] Z. Han, X.-L. Zhao, P. Peng, S. Li, C. Zhang, M. Cao, K. Li, Z.-Y. Wang and S.-Q. Zang, *Nano Res.*, 2020, **13**, 3248-3252.
- [11] X.-Y. Wang, J. Zhang, J. Yin, S.-H. Liu and B.-Z. Tang, *Mater. Chem. Front.*, 2021, **5**, 368-374.
- [12] Z. Han, X.-Y. Dong, P. Luo, S. Li, Z.-Y. Wang, S.-Q. Zang and T. C. W. Mak, *Sci. Adv.*, 2020, **6**, eaay0107-eaay0114.
- [13] M.-M. Zhang, X.-Y. Dong, Z.-Y. Wang, X.-M. Luo, J.-H. Huang, S.-Q. Zang and T. C. W. Mak, *J. Am. Chem. Soc.*, 2021, **143**, 6048-6053.
- [14] M.-M. Zhang, X.-Y. Dong, Z.-Y. Wang, H.-Y. Li, Shi-Jun Li, X. Zhao and S.-Q. Zang, *Angew. Chem.*, 2020, **59**, 10052-10058.
- [15] Y.-J. Kong, Z.-P. Yan, S. Li, H.-F. Su, K. Li, Y.-X. Zheng and S.-Q. Zang, *Angew. Chem.*, 2020, **59**, 5336-5340.
- [16] S. Wada, Y. Kitagawa, T. Nakanishi, K. Fushimi, Y. Morisaki, K. Fujita, K. Konishi, K. Tanaka, Y. Chujo and Y. Hasegawa, *NPG Asia Mater.*, 2016, **8**, e251.
- [17] Y. Hasegawa, Y. Miura, Y. Kitagawa, S. Wada, T. Nakanishi, K. Fushimi, T. Seki, H. Ito, T. Iwasa, T. Taketsugu, M. Gon, K. Tanaka, Y. Chujo, S. Hattori, M. Karasawae and K. Ishii, *Chem. Comm.*, 2018, **54**, 10695-10697.
- [18] M. Zeng, A. Ren, W.-B. Wu, Y.-S. Zhao, C.-L. Zhan and J.-N. Yao, *Chem. Sci.*, 2020, **11**, 9154-9161.
- [19] T.-H. Zhao, J.-L. Han, X. Jin, Y. Liu, M.-H. Liu and P.-F. Duan, *Angew. Chem.*, 2019, **58**, 4978-4982.
- [20] H.-R. Fu, N. Wang, X.-X. Wu, F.-F. Li, Y. Zhao, L.-F. Ma and M. Du, *Adv. Optical Mater.*, 2020, **8**, 2000330.
- [21] P. Leo, G. Orcajo, J. A. Garcí'a, A. M. Ortuño, J. M. Cuerva, D. Briones, G. Calleja, A. Rodríguez-Diéguez, b. Raul Sanz, J. Cepeda and F. Martínez, *J. Mater. Chem. C*, 2021, **9**, 5544-5553.
- [22] C.-T. Yeung, K.-H. Yim, H.-Y. Wong, R. Pal, W.-S. Lo, S.-C. Yan, M. Y.-M. Wong, D. Yufit, D. E. Smiles, L. J. McCormick, S. J. Teat, D. K. Shuh, W.-T. Wong and G.-L. Law, *Nat. Commun.*, 2017, **8**, 1128.
- [23] Y.-Y. Zhou, H.-F. Li, T.-Y. Zhu, T. Gao and P.-F. Yan, *J. Am. Chem. Soc.*, 2019, **141**, 19634-19643.
- [24] Y.-L. Ding, C.-S. Shen, F. Gan, J.-H. Wang, G.-L. Zhang, L.-L. Li, M.-H. Shu, B.-S. Zhu, J. Crassous and H.-B. Qiu, *Chin. Chem. Lett.*, 2021, **32**, 3988-3992.
- [25] C.-J. Li, Yuan-Yuan Liu, Y.-P. Wang, J. Guo and M. Pan, *Sci. Sin. Chim.*, 2020, **50**, 687-694.
- [26] J. Kumar, B. Marydasan, T. Nakashima, T. Kawaia and J. Yuasa, *Chem. Comm.*, 2016, **52**, 9885-9888.
- [27] Z.-W. Yao, Y.-Y. Zhou, T. Gao, P.-F. Yan and H.-F. Li, *RSC Adv.*, 2021, **11**, 10524-10531.
- [28] Y. B. Tan, Y. Okayasu, S. Katao, Y. Nishikawa, F. Asanoma, M. Yamada, J. Yuasa and T. Kawai, *J. Am. Chem. Soc.*, 2020, **142**, 17653-17661.

- [29] T. Ono, K. Ishihama, A. Taema, T. Harada, K. Furusho, M. Hasegawa, M. A. Yuki Nojima and Y. Hisaeda, *Angew. Chem.*, 2021, **60**, 2614-2618.
- [30] H. Ito, H. Sakai, Y. Okayasu, J. Yuasa, T. Mori and T. Hasobe, *Chem. Eur. J.*, 2018, **24**, 16889-16894.
- [31] N. Wang, J.-J. Zhao, Q. Xu, P.-Y. Xing, S.-Y. Feng, X.-D. Xu and H.-B. Yang, *J. Mater. Chem. C*, 2022, **10**, 13860-13870.
- [32] G.-F. Huo, Q. Tu, Y.-X. Hu, B. Jiang, Q.-F. Zhou, Y.-F. Niu, X.-L. Zhao, H.-M. Ding, J. Wen, G.-Q. Yin, X.-L. Shi and L. Xu, *Sci. China Mater.*, 2021, **65**, 469-476.
- [33] Q.-Y. Zhu, L.-P. Zhou, L.-X. Cai, X.-Z. Li, J. Zhou and Q.-F. Sun, *Chem. Comm.*, 2020, **56**, 2861-2864.
- [34] L. Arrico, L. D. Bari and F. Zinna, *Chem. Eur. J.*, 2021, **27**, 2920-2934.
